# Supplementary material for: Design of a palette of SNAP-tag mimics of fluorescent proteins and their use as cell reporters
Source: PubMed Central journal article supplement (PMC10264356; doi:10.1038/s41421-023-00546-y), 2023-06-13
Supplement: 41421_2023_546_MOESM1_ESM.pdf [file 41421_2023_546_MOESM1_ESM.pdf]

# Supplementary information

## Design of a Palette of SNAP-tag Mimics of Fluorescent Proteins and Their Use as Cell Reporters

### Supplementary Figures

**Figure S1:** Evolution and Characterization of the SNAP-tag Mimics of Fluorescent Protein

**Figure S2:** Monitoring Protein Expression, Unfolding, Degradation, and Protein-protein

Interaction Using SmFP

**Figure S3:** Atomic (Crystal) Structure of SmFP Reveals Mechanism of Fluorescence Activation

**Figure S4:** Fluorogenic Labeling of Subcellular Targeted SNAP<sub>f</sub> Fusions

**Figure S5:** Comparison of SmFPs with Previously Developed Fluorogenic Ligands for SNAP-tag

**Figure S6:** In vivo Imaging of Xenograft Tumors Using SmFPs

**Figure S7:** Real-time Monitoring of Protein Expressing, Assembly, and Trafficking Using

SmFPs-based Multi-color Pulse-chase

**Figure S8:** Construction of Synthetic Ca<sup>2+</sup> Sensor

**Figure S9:** Imaging of Spontaneous Calcium Oscillations in Dissociated Neurons

### Supplementary Tables

**Table S1:** Photophysical properties of SmFPs

**Table S2:** Photophysical properties of SiCa and FP-based calcium sensors

**Table S3:** Photophysical properties of FPs or SmFPs with emission over 640 nm

**Table S4:** SmFP485 data collection and refinement statistics

**Table S5:** Photophysical properties of fluorogenic probes for different self-labeling tags

### Supplementary Videos

**Video S1:** Degradation of SmFP485 by AID system

**Video S2:** Degradation of SNAP<sub>f</sub>-Fluorescein by AID system

**Video S3:** Realtime imaging of CX43 synthesis and gap junction assembly

**Video S4:** Time-lapse imaging of Golgi-SNAP<sub>f</sub> intracellular trafficking

**Video S5:** Realtime imaging of the dynamic of cellular calcium using SiCa485

**Video S6:** Realtime imaging of the dynamic of cellular calcium using SiCa675

### Supplementary Notes

Fluorophore synthesis

### Supplementary References

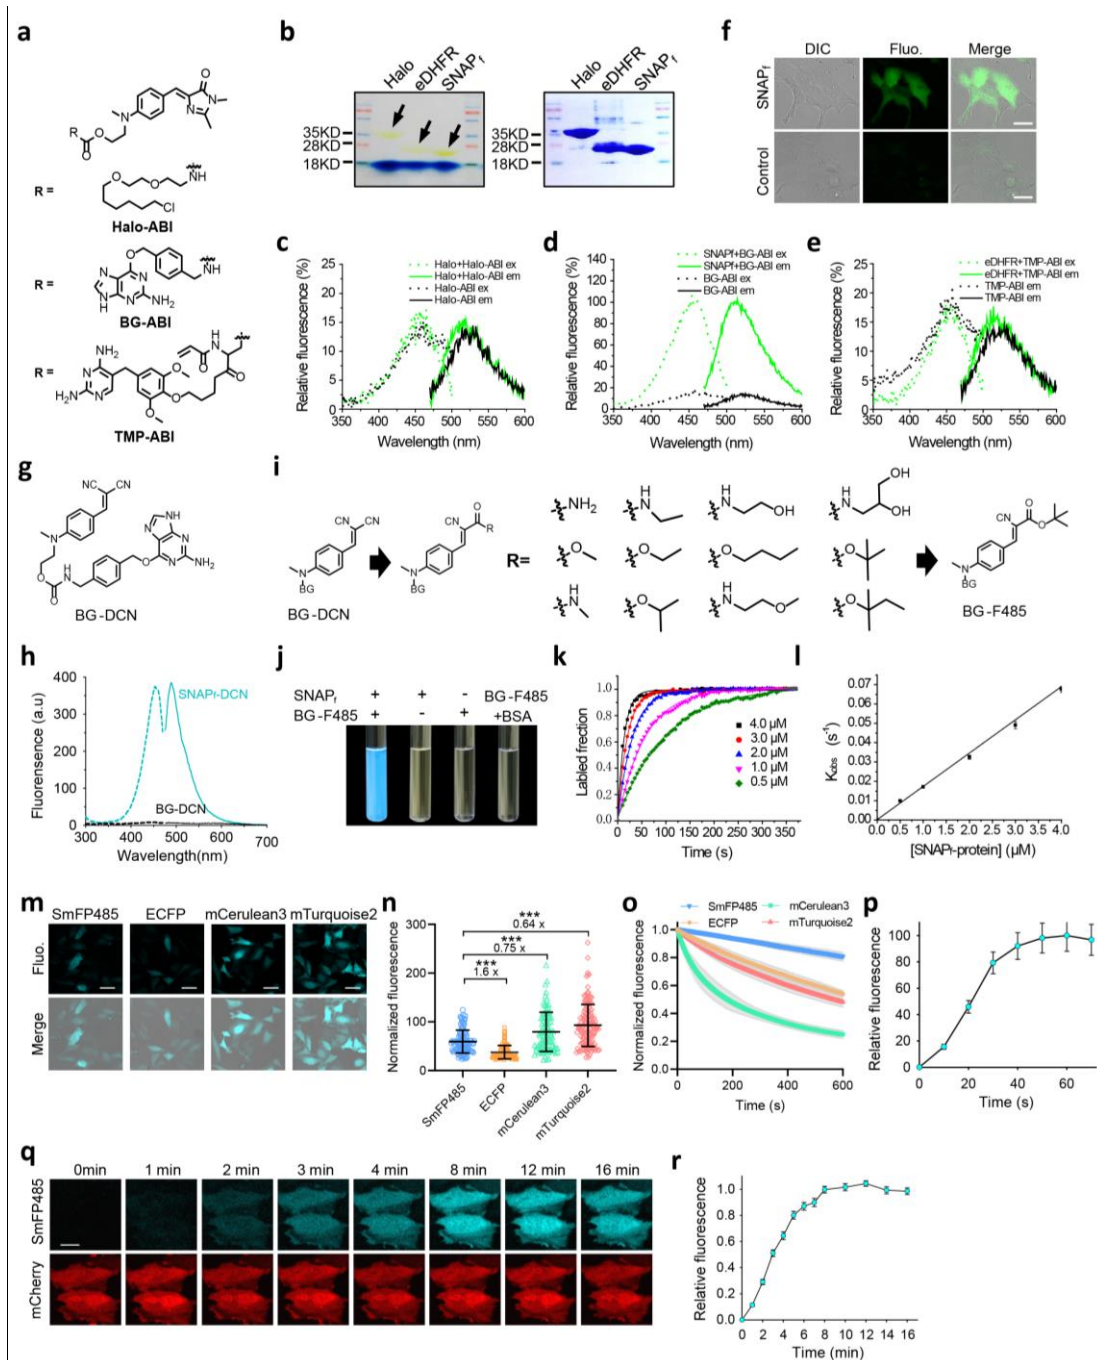

1

2 **Supplementary Figure S1 Evolution and Characterization of the SNAP-tag Mimics of**  
 3 **Fluorescent Protein. (a)** Molecular structure of BG-ABI, Halo-ABI, and TMP-ABI. **(b)** SDS PAGE  
 4 of the covalent complex of ABI-SNAP<sub>f</sub>, ABI-Halo-tag, and ABI-eDHFR. The yellow color of  
 5 covalently bound ABI dye is indicated by the arrows. Gel was imaged before (left) and after  
 6 (right) Coomassie Brilliant Blue staining. **(c)-(e)** Excitation (dashed) and emission (solid)  
 7 spectra of ABI-SNAP<sub>f</sub>, ABI-Halo-tag, and ABI-eDHFR covalent complexes. Fluorescence was  
 8 normalized to ABI-SNAP<sub>f</sub> covalent complex. **(f)** Imaging of ABI-SNAP<sub>f</sub> fluorescence in live HeLa  
 9 cells. Scale bars, 20 μm. **(g)** Molecular structure of BG-DCN. **(h)** Excitation (dashed) and

1 emission (solid) spectra of BG-DCN (black) and DCN-SNAP<sub>f</sub> (cyan). **(i)** Molecular structure  
2 showing the synthetic evolution of BG-F485 from BG-DCN. **(j)** Fluorescence of BG-F485 is  
3 activated by its reaction with SNAP<sub>f</sub>, but not interaction with BSA. **(k)** Kinetics of SNAP<sub>f</sub> protein  
4 covalently labeled by BG-F485. Reactions between 100 nM BG-F485 and different  
5 concentrations of SNAP<sub>f</sub> protein at 37 °C were monitored by the increase of fluorescence over  
6 time. Error bars, mean ± SEM. (n = 4). **(l)** Calculated  $k_{obs}$  plotted against protein concentration.  
7 Error bars, mean ± SEM. (n = 4). **(m)** Comparison of SmFP485 with cyan FPs. HeLa cells  
8 transfected with plasmid expressing SNAP<sub>f</sub>, ECFP, mCerulean3 or mTurquoise2 were imaged  
9 using a 405 nm laser excitation and a 410-500 nm emission 48 h after transfection. For imaging  
10 of SmFP485, the cells were incubated with 2 μM BG-F485 prior to imaging. Scale bars, 50 μm.  
11 **(n)** Quantification of SmFP485, ECFP, mCerulean3 and mTurquoise2 fluorescence in individual  
12 cells. The fluorescence was normalized to spectra of SmFP485 and each FP, respectively. Data  
13 represent the mean ± s.d. (n = 100 cells). Statistical comparison was performed by two-tailed  
14 t-test. \*\*\* $P < 0.001$ . **(o)** Photostability of SmFP485 and cyan FPs in live cells. HeLa cells (n=20)  
15 expressing SNAP<sub>f</sub>-H2B, ECFP-H2B, mCerulean3-H2B or mTurquoise2-H2B were constitutively  
16 imaged using a confocal laser scanning microscope with 405 nm laser. The curves were  
17 normalized to spectra difference of the proteins. **(p)** Kinetics of SmFP485 fluorescence  
18 generation in cells (n=10) expressing plasma membrane-localized SNAP<sub>f</sub>. Data related to **Fig.**  
19 **1e.** **(q)** Consecutive imaging of SmFP485 fluorescence generation in cells expressing SNAP<sub>f</sub>  
20 incubated with 2 μM BG-F485. Scale bar, 10 μm. **(r)** Kinetics of SmFP485 fluorescence  
21 generation in cells (n=10) expressing SNAP<sub>f</sub>.

22  
23  
24  
25  
26  
27  
28  
29  
30

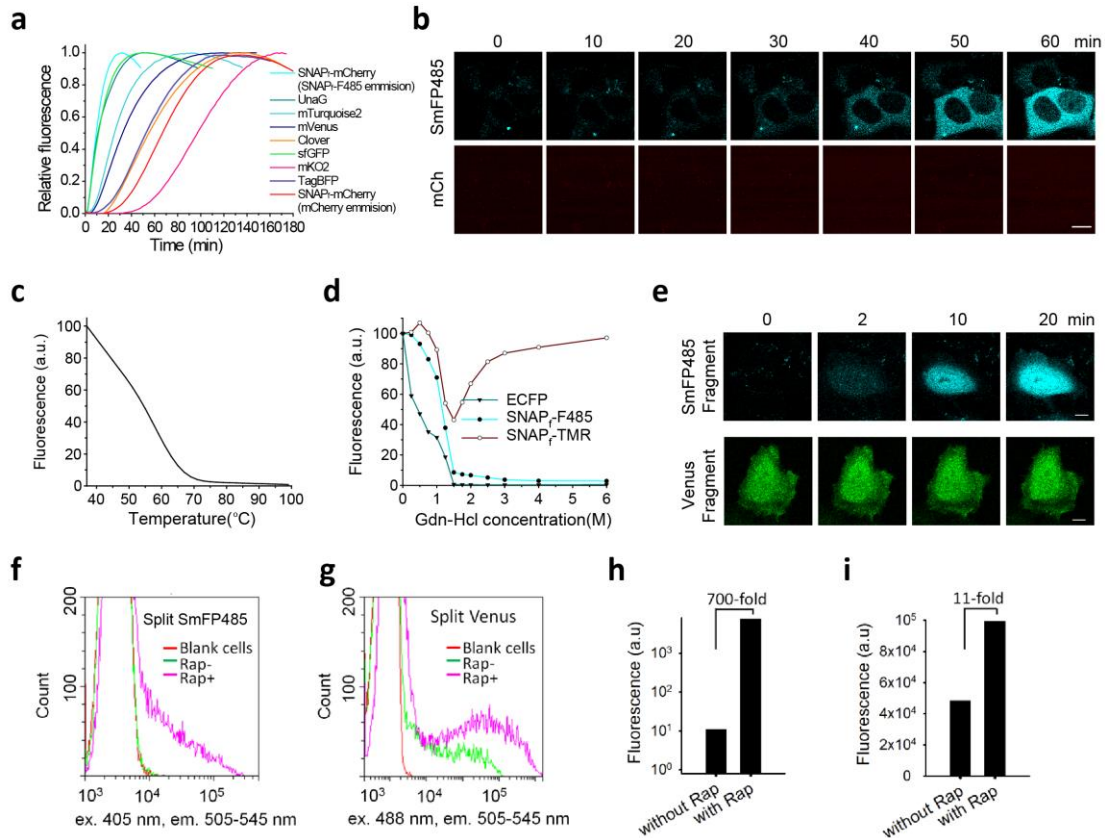

1

2 **Supplementary Figure S2 Monitoring Protein Expression, Unfolding, Degradation, and**

3 **Protein-protein Interaction Using SmFP. (a) Fluorescence generation of *in vitro* synthesized**

4 **SmFP485 and FPs. Fluorescence was monitored immediately after addition of mRNAs of SNAP<sub>f</sub>**

5 **or FPs to the *in vitro* protein expression reaction mixture. (b) Brightened (4x) images from Fig.**

6 **2b. Scale bar, 10 μm. (c) SmFP485 fluorescence in response to temperature. (d) Fluorescence**

7 **of SmFP485, ECFP, and SNAP<sub>f</sub> covalently labeled with TMR in response to different**

8 **concentrations of Gdn-HCl. Error bars in (c) and (d), mean ± SEM. (n = 3). (e) Brightened (12x)**

9 **images from Fig. 2j. Scale bars, 10 μm. (f) and (g) FACS analysis of BiFC based on SNAP<sub>f</sub>-**

10 **fragment and Venus-fragment. (h) and (i) BiFC contrast upon rapamycin addition for SmFP485-**

11 **fragment (h) and Venus-fragment (i). BiFC contrast is a conventional notion in the field of split**

12 **reporters that describes the difference between the real, induced signal, and background**

13 **fluorescence, originated from a nonspecific split reporter complementation <sup>1</sup>. Quantitative**

14 **data were derived from (f) and (g), respectively.**

15

16

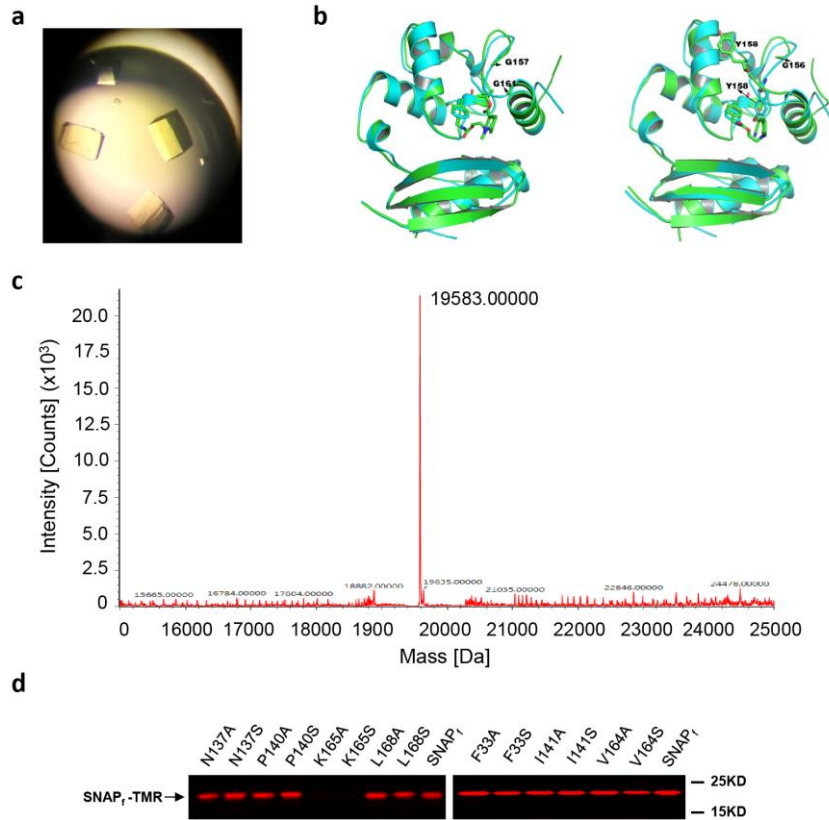

1

2 **Supplementary Figure S3 Atomic (Crystal) Structure of SmFP Reveals Mechanism of**  
 3 **Fluorescence Activation. (a) Crystal of SmFP485. (b) Alignment of the structure of SmFP485**  
 4 **(Green, left for subunit 1 and right for subunit 2) and 3L00 (Cyan). Residues in the loop**  
 5 **covering the active site are shown. (c) LC-MS spectra of SmFP485. A crystal of SmFP485 was**  
 6 **selected and dissolved in distilled water, then analyzed by LC-MS. The MW confirmed only a**  
 7 **guanine group leaving during the labeling procedure. (d) In-gel validation of the capacity for**  
 8 **covalent binding of the SNAP<sub>f</sub> mutants to BG-TMR. Ten  $\mu$ M protein of SNAP<sub>f</sub> mutants was**  
 9 **incubated with 50  $\mu$ M BG-TMR for 1 hr, and was loaded onto SDS PAGE.**

10

11

12

13

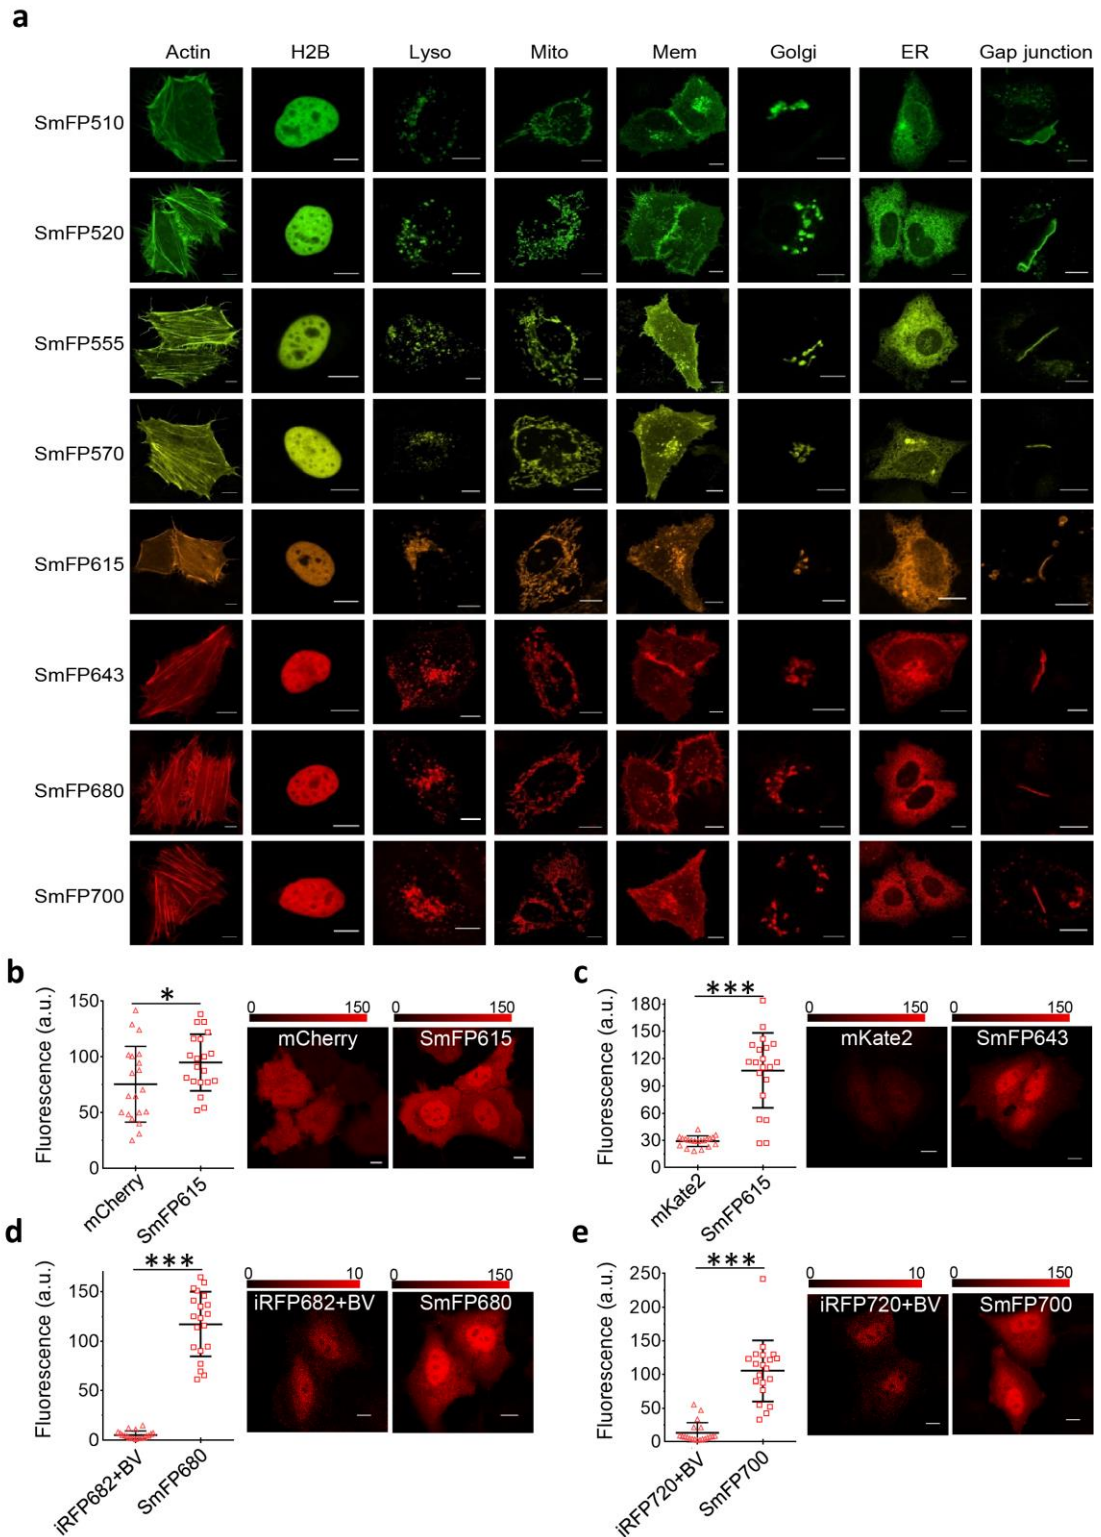

1

2 **Supplementary Figure S4 Fluorogenic Labeling of Subcellular Targeted SNAP<sub>f</sub> Fusions Using**  
 3 **SmFPs. (a)** Cells expressing different subcellular targeted SNAP<sub>f</sub> fusions were labeled with  
 4 different fluorophores and imaged. Scale bars, 10 μm. **(b)-(e)**, Comparison of SmFPs  
 5 fluorescence with mCherry **(b)**, mKate2 **(c)**, iRFP682 **(d)**, and iRFP720 **(e)** in HeLa cells (n=20).

1 HeLa cells were transiently transfected with constructs expressing SNAP<sub>F</sub>-IRES-ZsGreen,  
2 mCherry-IRES-ZsGreen, mKate2-IRES-ZsGreen, iRFP682-IRES-ZsGreen, or iRFP720-IRES-  
3 ZsGreen. Forty-eight hours after transfection, cells were imaged using 561 nm excitation and  
4 570-700 nm emission for mCherry and SmFP615, 600 nm excitation and 610-750 nm emission  
5 for mKate2 and SmFP643, 663 nm excitation and 670-770 nm emission for iRFP682 and  
6 SmFP680, and 670 nm excitation and 675-790 emission for iRFP720 and SmFP700. For iRFP682  
7 and iRFP70, the cells were incubated with 25  $\mu$ M BV for 2 hr before imaging. Fluorescence  
8 intensities were firstly corrected for the spectral differences per FP or SmFP variant; and then  
9 were normalized to ZsGreen fluorescence in order to account for variations in transfection  
10 efficiency among cells. Scale bars, 10  $\mu$ m. Statistical comparison was performed by two-tailed  
11 *t* test, \**P* < 0.05; \*\*\**P* < 0.001.

12  
13  
14  
15  
16  
17  
18  
19  
20  
21  
22  
23  
24  
25  
26  
27  
28  
29  
30  
31  
32  
33  
34  
35  
36

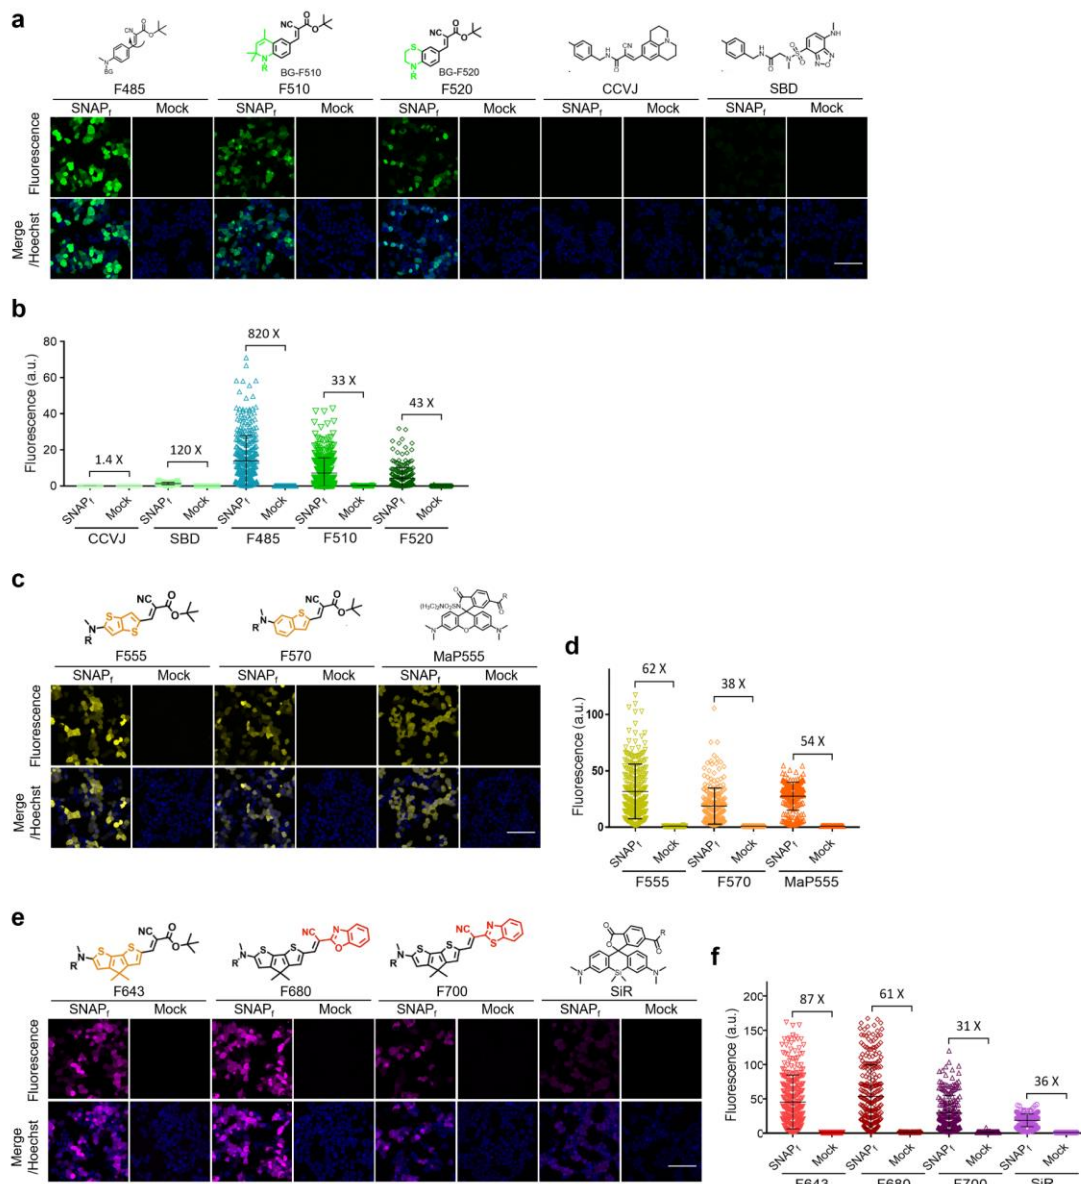

1

2 **Supplementary Figure S5 Comparison of SmFPs with Previously Developed Fluorogenic**

3 **Ligands for SNAP-tag.** HEK293T cells transfected with plasmid expressing SNAP<sub>f</sub> protein were

4 labeled with different ligands 48 hours after transfection. The cells were imaged using a Leica

5 SP8 confocal laser scanning microscope with a 458 nm excitation and a 465-600 nm emission

6 for CCVJ, SBD, SmFP485, SmFP510 and SmFP520 (a), a 525 nm excitation and a 530-650 nm

7 emission for SmFP555, a 510 nm excitation and a 515-650 nm emission for SmFP570, a 555

8 nm excitation and a 560-650 nm emission for MaP555 (c), a 625 nm excitation and a 630-790



1 nm emission for SmFP643, a 665 nm excitation and 670-790 nm emission for SmFP680, a 670  
2 nm excitation and a 675-790 nm emission for SmFP700 and a 640 nm excitation and a 645-790  
3 nm emission for SiR **(e)**, respectively. The fluorescence of the cells was quantified **(b, d, f)**.  
4 HEK293T cells transfected with empty plasmid expressing no SNAP<sub>f</sub> protein were used as the  
5 controls. Scale bars in **(a)**, **(c)** and **(e)**, 50 μm. Data in **(b)**, **(d)** and **(f)** represent the mean ± s.d.  
6 (N ≥ 100 cells)

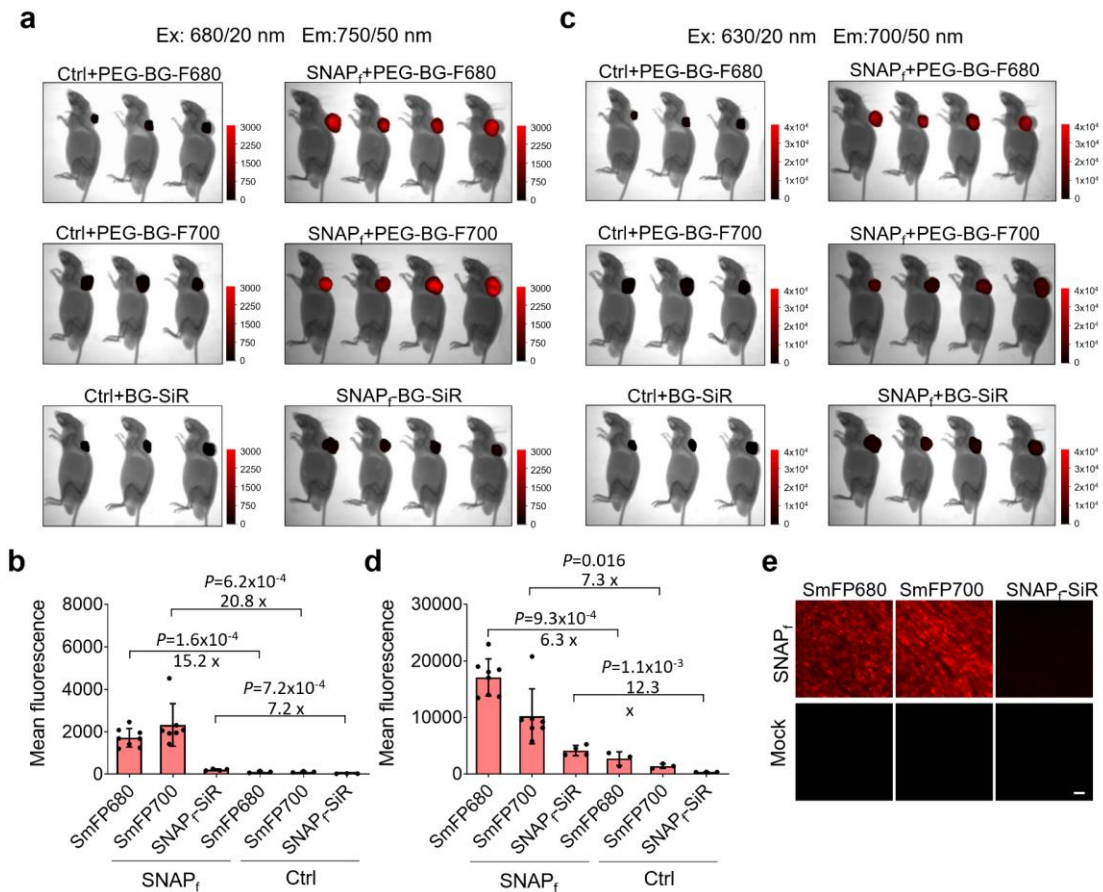

1  
2 **Supplementary Figure S6 In vivo Imaging of Xenograft Tumors Using SmFPs.** Xenograft  
3 tumors were established using either U87-WT cells or U87-SNAP<sub>f</sub> stable cells. In order to  
4 increase the hydrophilic of the ligands for *in vivo* labeling, we synthesized PEGylated BG-F680  
5 and BG-F700 that could be bound by SNAP<sub>f</sub>-tag upon esterlysis by esterase in the blood to  
6 remove the PEG groups <sup>2</sup>. 0.4 μmol of the PEG-BG-F700, PEG-BG-F680 or SiR-SNAP was  
7 introduced into the mice using intravenous injection. The fluorescence of the tumors was  
8 imaged and qualified at 12 h after injection, using an excitation of 680/20 nm and an emission  
9 of 750/50 nm (**a** and **b**), or an excitation of 630/20 nm and an emission of 700/50 nm (**c** and  
10 **d**). Data represent the mean ± S.D. from 3-8 mice. Statistical comparison was carried out by  
11 two-tailed *t* test, and the P values were indicated. (**e**) Fluorescence imaging of the tumor  
12 sections from the mice in (**a**) using an excitation of 685/30 nm and an emission of 730/30 nm.  
13 Scale bar, 100 μm.

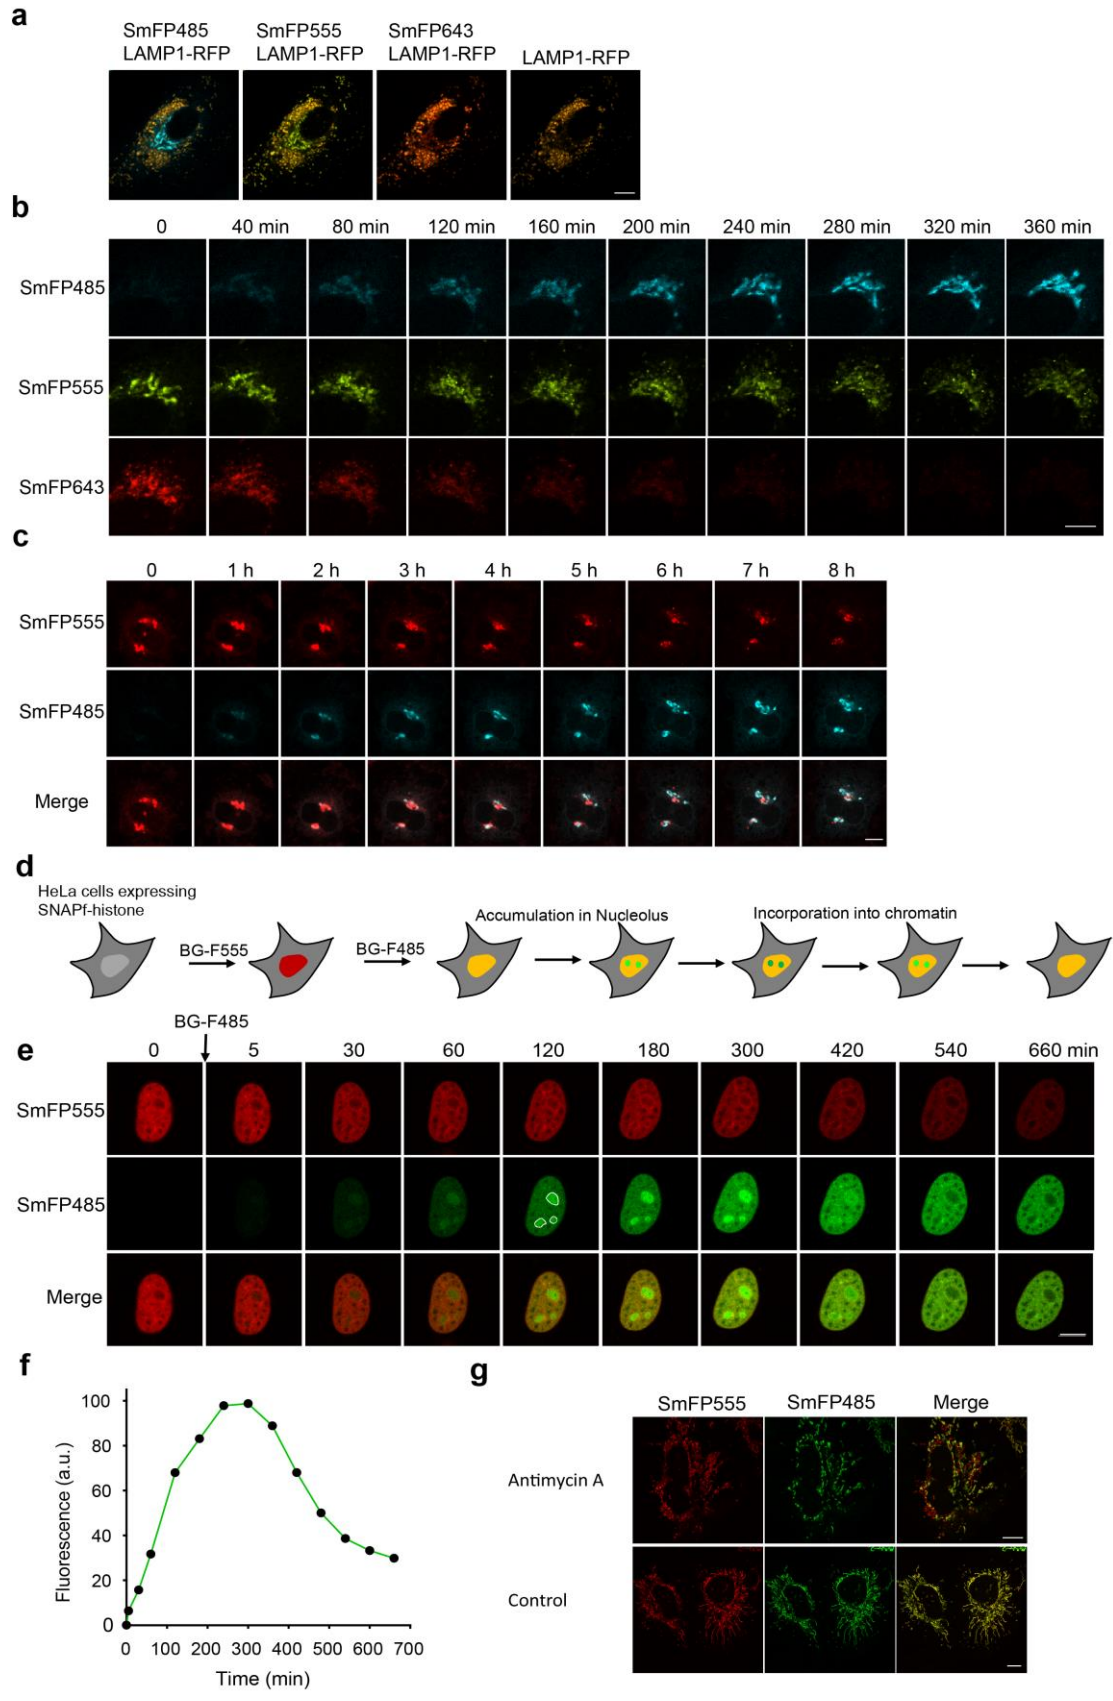

1

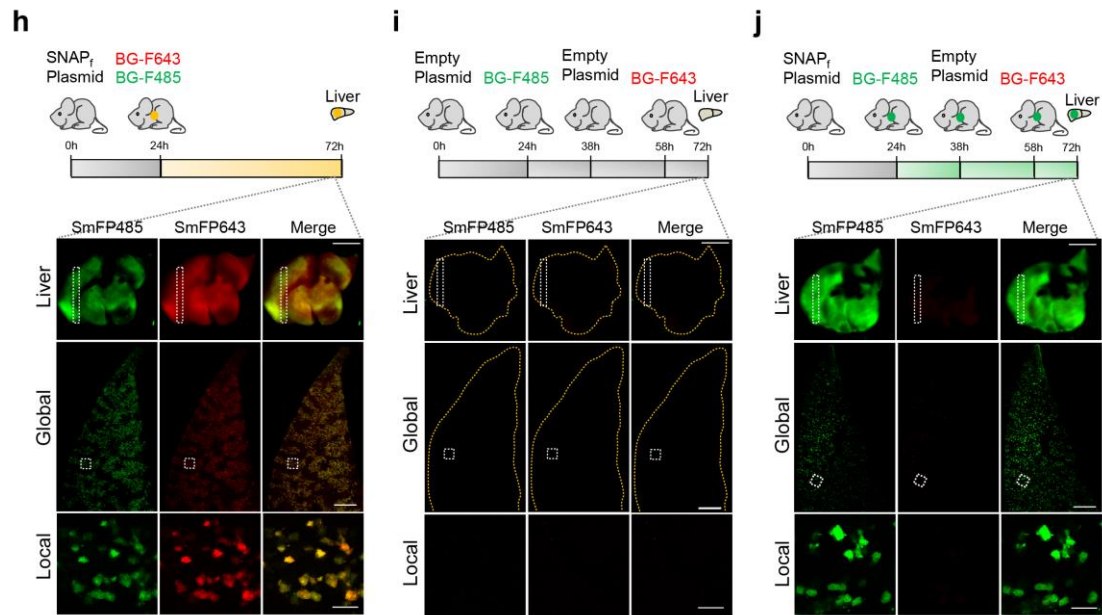

1

2 **Supplementary Figure S7 Real-time Monitoring of Protein Expressing, Assembly, and**

3 **Trafficking Using SmFPs-based Multi-color Pulse-chase. (a)** Multi-color pulse-chase images of

4 Golgi-SNAP<sub>f</sub> trafficking. LAMP1-RFP fluorescence was merged with SmFP485, SmFP555, or

5 SmFP643. Data were from **Fig. 5d**. Scale bar, 10 μm. **(b)** Real-time pulse-chase labeling of

6 Golgi apparatus-localized protein with SmFPs. HeLa cells were co-transfected with pGolgi-

7 SNAP<sub>f</sub> and pLamp1-RFP. Twenty-four hours after transfection, cells were labeled with BG-F485

8 for 30 min. The cells were washed twice with PBS to remove unbound BG-555 and incubated

9 with BG-F555 for 30 min. The cells were next washed twice and labeled with BG-F643, and

10 time-lapse images were performed to monitor the newly synthesized Golgi-SNAP<sub>f</sub> and the old

11 Golgi-SNAP<sub>f</sub> protein. Scale bar, 10 μm. **(c)** Time-lapse imaging of Golgi-SNAP<sub>f</sub> intracellular

12 trafficking. HeLa cells expressing Golgi-SNAP<sub>f</sub> were first labeled with BG-F555 for 1 hr, and

13 washed twice with fresh medium. Images were recorded immediately after incubation with

14 BG-F485. Scale bars, 10 μm. **(d)** and **(e)** HeLa cells transfected with SNAP<sub>f</sub>-histone expressing

15 plasmid were labeled with 1 μM BG-F555 for 30 min 24 hr after transfection. The cells were

16 washed twice with PBS to remove unbound BG-555 and incubated with 1 μM BG-F485. Images

17 were recorded immediately after incubation with BG-F485. Scale bar, 10 μm. **(f)**

18 Quantification of SmFP485 fluorescence of the nucleoli indicated by white circles in **(e)**. Data

19 represent mean fluorescence. **(g)** HeLa cells expressing mitochondrial localized SNAP<sub>f</sub> were

20 labeled with 1 μM BG-F555 for 60 min 24 hr after transfection. The cells were washed twice

1 with PBS to remove unbound BG-555 and incubated with 2  $\mu$ M antimycin A and 1  $\mu$ M BG-F485.  
2 Cells without treatment of antimycin A were used as the controls. Images were recorded 12  
3 hr after incubation with BG-F485. Scale bars, 10  $\mu$ m. **(h)-(j)** Imaging of SNAP<sub>f</sub> synthesis in mice  
4 livers. Fluorescence imaging of livers from mice treated with a single injection of SNAP<sub>f</sub> plasmid  
5 and simultaneously labeled with BG-F485 and BG-F643 at 24 hr **(h)**, or mice treated without  
6 injection of SNAP<sub>f</sub> plasmid and sequentially labeled with BG-F485 and BG-F643 at 24 hr and  
7 58 hr, respectively **(i)**, or mice treated with single injection of SNAP<sub>f</sub> plasmid and sequentially  
8 labeled with BG-F485 and BG-F643 at 24 hr and 58 hr, respectively **(j)**. Scale bars for the liver,  
9 global, and local images were 5,000  $\mu$ m, 1,000  $\mu$ m, and 100  $\mu$ m, respectively.

10  
11  
12  
13  
14  
15  
16  
17  
18  
19  
20  
21  
22  
23  
24  
25

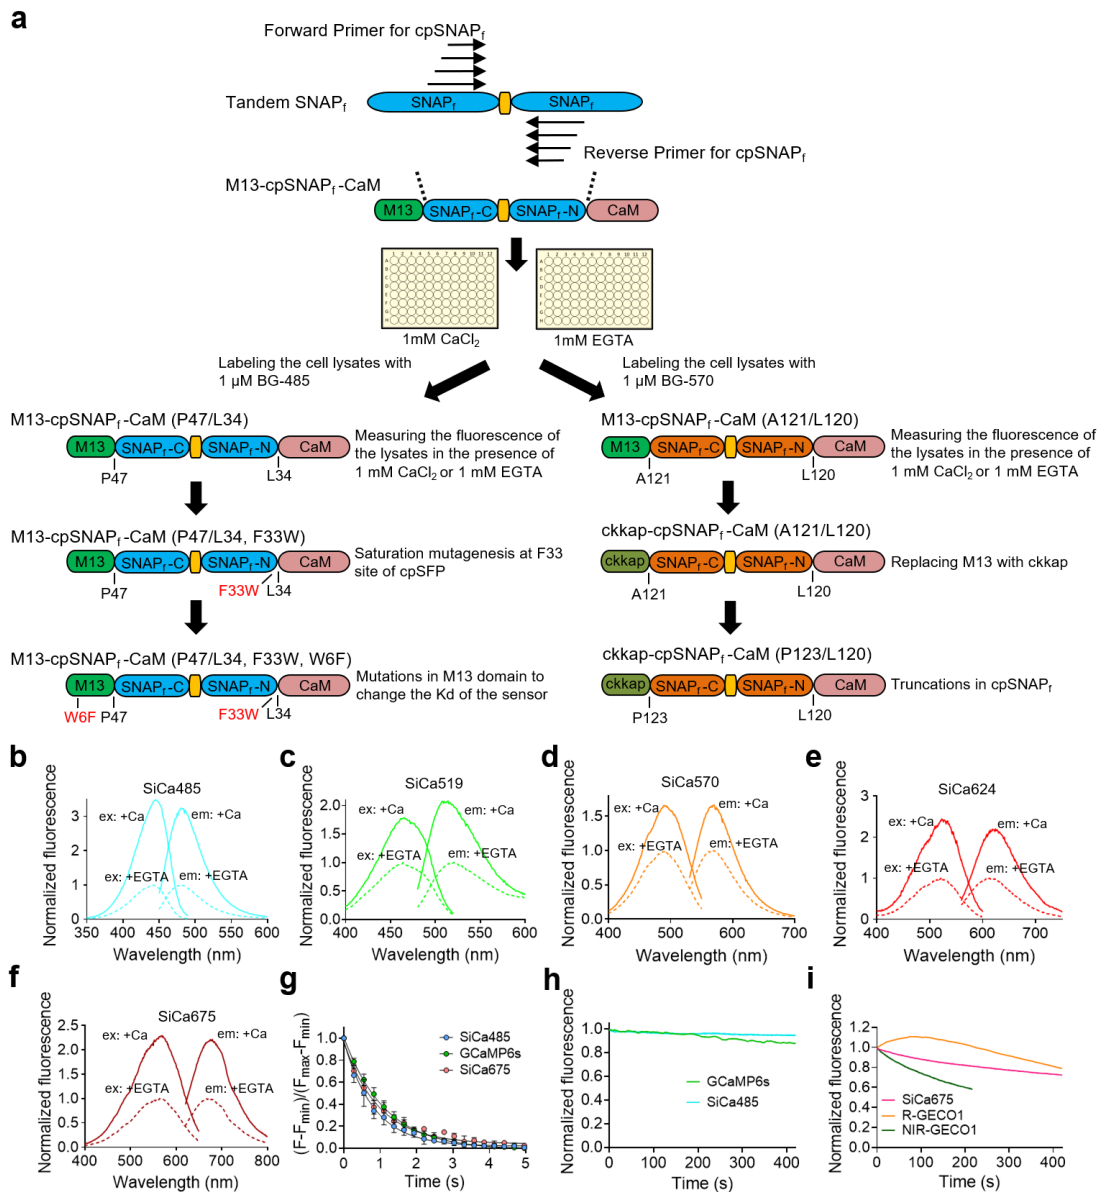

1

2 **Supplementary Figure S8 Construction of Synthetic Ca<sup>2+</sup> Sensor.** (a) Construction and  
 3 optimization of Ca<sup>2+</sup> sensor based on cpSmFP485 and cpSmFP570. We firstly generated the  
 4 circularly permuted variants of SNAP<sub>f</sub> (cpSNAP<sub>f</sub>) at different loops in SNAP<sub>f</sub> protein by linking  
 5 the original N- and C-termini with a GGGSGGSGGGS flexible linker. We found that cpSNAP<sub>f</sub>  
 6 variants at loop (106-111), loop (136-138) and loop (151-155) were difficult to be expressed.  
 7 Hence, we chose cpSNAP<sub>f</sub> variants at loop (34-50), loop (86-93) and loop (122-126) to  
 8 construct Ca<sup>2+</sup> sensor. Different truncated forms of the cpSNAP<sub>f</sub> variants were inserted  
 9 between the M13 peptide and calmodulin (CaM) and cloned into bacterial expression vector.  
 10 The constructs were transformed into BL21 (DE3) cells and recombinant protein expression  
 11 were induced at 18 °C for 24 hrs in the presence of 1 mM IPTG. Cells were lysed by sonication

1 and labeled with 1  $\mu$ M BG-485 or BG-570, and fluorescence was recorded in the presence of  
2 1 mM  $\text{CaCl}_2$  or EGTA. M13-cpSNAP<sub>f</sub>-CaM (P47/L34) variant based on cpSmFP485 and M13-  
3 cpSNAP<sub>f</sub>-CaM (A121/L120) showed the maximal fluorescence enhancement upon addition of  
4  $\text{Ca}^{2+}$ . For M13-cpSNAP<sub>f</sub>-CaM (P47/L34), F33 saturation mutagenesis in SNAP<sub>f</sub> was carried out  
5 to generate the M13-cpSNAP<sub>f</sub>-CaM (P47/L34, F33W) variant showing the improved  
6 fluorescence enhancement upon addition of  $\text{Ca}^{2+}$ . A W6F mutation in the M13 domain showed  
7 a more suitable  $K_d$  for measuring the dynamics of intracellular  $\text{Ca}^{2+}$ . For M13-cpSNAP<sub>f</sub>-CaM  
8 (A121/L120), M13 was replaced with ckkap to generate ckkap-cpSNAP<sub>f</sub>-CaM (A121/L120).  
9 Then, truncations in cpSNAP<sub>f</sub> were performed to obtain a sensor showing the maximal  
10 fluorescence enhancement upon addition of  $\text{Ca}^{2+}$ . **(b)-(f)** Excitation spectrum (dashed line) and  
11 emission spectrum (solid line) of the synthetic indicators of calcium in the  $\text{Ca}^{2+}$ -free and  $\text{Ca}^{2+}$ -  
12 bound states. **(g)** The kinetics of the disassociation of  $\text{Ca}^{2+}$  to SiCa485, SiCa675 and GCaMP6s.  
13 The hexahistidine tag-containing SiCa485, SiCa675 or GCaMP6s protein was immobilized onto  
14 the Ni-NTA agarose. The disassociation kinetics was measured by recording the fluorescence  
15 of the agarose immediately after a EGTA-containing buffer was added to chelate the free  
16 calcium in the solution. The curve were fitted to the formula of exponential decay ( $y = y_0 + a \cdot e^{-bx}$ ),  
17 where  $y$  represents the indicator-calcium complex over time,  $x$  is time,  $y_0$  represents the  
18 nonspecific binding,  $a$  is the maximum binding at equilibrium, and  $b$  is the rate constant. Data  
19 represent the mean fluorescence of four agarose beads. **(h)** The photostability of SiCa485 and  
20 GCaMP6s in live cells. HeLa cells expressing H2B-SiCa485 or H2B-GCaMP6s were imaged using  
21 a confocal laser scanning microscope with a 470 nm laser excitation. The curves were  
22 normalized to spectra of SiCa485 and GCaMP6s, respectively. Data represent the mean  
23 fluorescence of 20 cells. **(h)** The photostability of SiCa675, R-GECO1 and NIR-GECO1 in live  
24 cells. HeLa cells expressing H2B-SiCa675, or H2B-R-GECO1 and H2B-NIR-GECO1 were imaged  
25 using a confocal laser scanning microscope with a 570 nm laser excitation. The curves were  
26 normalized to spectra of SiCa675, R-GECO1 and NIR-GECO1, respectively. Data represent the  
27 mean fluorescence of 20 cells.  
28

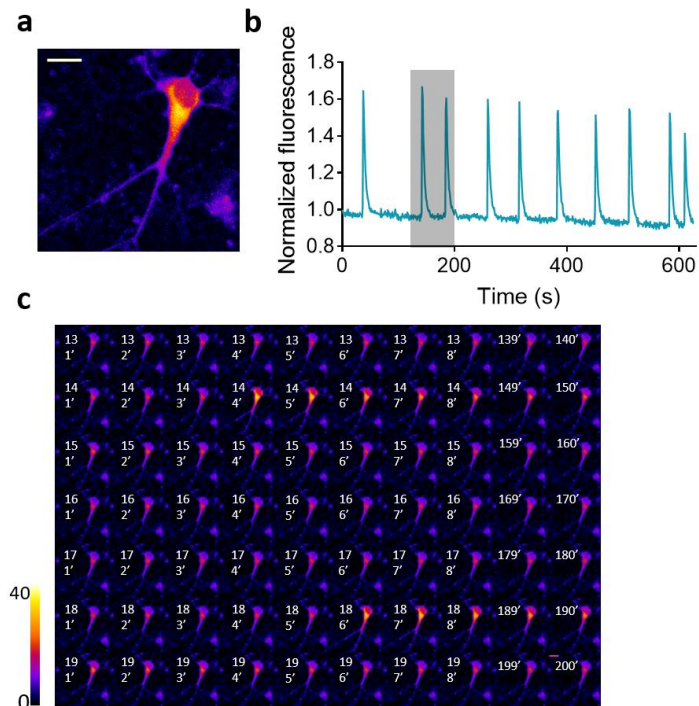

1

2 **Supplementary Figure S9 Imaging of Spontaneous Calcium Oscillations in Dissociated**

3 **Neurons. (a)** Image of dissociated neurons expressing SiCa485. The dissociated neurons were

4 transfected with pAAV-RSET-SiCa485 plasmid and labeled with 1  $\mu$ M BG-F485 48 h after

5 transfection. The neurons were then incubated in HBSS buffer (containing 10 mM HEPES) and

6 consecutive imaging of SiCa485 fluorescence was performed. **(b)** SiCa485 fluorescence

7 response to spontaneous calcium oscillations in the neuron shown in **(a)**. **(c)** A series of

8 fluorescence images between 130 and 200 seconds in **(b)**. Scale bar, 10  $\mu$ m.



1

**Supplementary Table S1 Photophysical properties of SmFPs**

| SmFPs   | $\lambda_{ab}(nm)$ | $\lambda_{Ex}(nm)$ | $\lambda_{Em}(nm)$ | $\epsilon(M^{-1}cm^{-1})$ | $\Phi FI$ | Fluorogenicity (fold) <sup>a</sup> | Brightness <sup>b</sup> | pKa |
|---------|--------------------|--------------------|--------------------|---------------------------|-----------|------------------------------------|-------------------------|-----|
| SmFP485 | 443                | 443                | 485                | 44000                     | 0.36      | 350                                | 15.8                    | 4.8 |
| SmFP510 | 459                | 460                | 510                | 35000                     | 0.48      | 300                                | 16.8                    | 5.8 |
| SmFP519 | 452                | 465                | 519                | 44000                     | 0.27      | 279                                | 11.9                    | 5.4 |
| SmFP520 | 453                | 462                | 520                | 42000                     | 0.35      | 365                                | 14.7                    | 5.4 |
| SmFP555 | 526                | 525                | 555                | 68000                     | 0.50      | 1174                               | 34.0                    | 5.1 |
| SmFP570 | 497                | 510                | 570                | 65000                     | 0.63      | 304                                | 41.0                    | 5.4 |
| SmFP615 | 552                | 565                | 615                | 65000                     | 0.76      | 589                                | 49.4                    | 5.4 |
| SmFP624 | 525                | 535                | 624                | 64000                     | 0.25      | 331                                | 16.0                    | 5.4 |
| SmFP643 | 625                | 626                | 643                | 69000                     | 0.64      | 935                                | 44.2                    | 5.2 |
| SmFP675 | 570                | 570                | 675                | 63000                     | 0.18      | 486                                | 11.3                    | 5.6 |
| SmFP680 | 663                | 665                | 680                | 72000                     | 0.51      | 891                                | 36.7                    | 5.1 |
| SmFP700 | 666                | 680                | 700                | 78000                     | 0.43      | 956                                | 33.5                    | 5.0 |

<sup>a</sup>Fluorescence increase relative to free fluorophore; <sup>b</sup>product of extinction coefficient and quantum yield.

2

3

4

5

1

**Supplementary Table S2 Photophysical properties of SmFP- and FP-based calcium sensors**

| SmFPs                  | $\lambda_{ab}(nm)$ | $\lambda_{Ex}(nm)$ | $\lambda_{Em}(nm)$ | $\epsilon(M^{-1}cm^{-1})$ |                   | $\Phi FI$         |                   | Dynamic range<br>( $F_{max}/F_{min}$ ) | Kd (nM) | $K_{on}(x10^6)$<br>( $M^{-1}s^{-1}$ ) | $K_{off}$<br>( $s^{-1}$ ) |
|------------------------|--------------------|--------------------|--------------------|---------------------------|-------------------|-------------------|-------------------|----------------------------------------|---------|---------------------------------------|---------------------------|
|                        |                    |                    |                    | +Ca <sup>2+</sup>         | -Ca <sup>2+</sup> | +Ca <sup>2+</sup> | -Ca <sup>2+</sup> |                                        |         |                                       |                           |
| SiCa485                | 440                | 446                | 485                | 31000                     | 29000             | 0.27              | 0.09              | 3.24                                   | 560     | 2.2                                   | 1.2                       |
| SiCa519                | 452                | 465                | 519                | 48000                     | 46000             | 0.51              | 0.26              | 2.08                                   | 870     | N.D.                                  | N.D.                      |
| GCaMP1 <sup>3</sup>    | 488                | 487                | 510                | 1400                      | 570               | 0.05              | 0.03              | 4.12                                   | 235     | N.D.                                  | N.D.                      |
| GCaMP2 <sup>4</sup>    | 491                | 487                | 508                | 19000                     | 5200              | 0.93              | 0.70              | 4.85                                   | 146     | N.D.                                  | N.D.                      |
| GCaMP6s <sup>5</sup>   | ND                 | 490                | 510                | 70117                     | 2118              | 0.64              | 0.41              | 53.8                                   | 144     | 4.3                                   | 0.69                      |
| jGCaMP7s <sup>5</sup>  | ND                 | 495                | 515                | 53068                     | 5554              | 0.65              | 0.58              | 40.4                                   | 68      | 21.5                                  | 2.87                      |
| SiCa570                | 485                | 491                | 570                | 56000                     | 54000             | 0.29              | 0.18              | 1.67                                   | ND      | N.D.                                  | N.D.                      |
| SiCa624                | 510                | 523                | 624                | 75000                     | 67000             | 0.25              | 0.13              | 2.20                                   | 710     | N.D.                                  | N.D.                      |
| SiCa675                | 551                | 569                | 675                | 59000                     | 48000             | 0.14              | 0.08              | 2.21                                   | 710     | 1.5                                   | 1.0                       |
| R-GECO1 <sup>6</sup>   | ND                 | 561                | 589                | 51000                     | 15000             | 0.20              | 0.06              | 16.0                                   | 482     | N.D.                                  | N.D.                      |
| NIR-GECO1 <sup>7</sup> | ND                 | 678                | 704                | 20000                     | 62000             | 0.019             | 0.063             | -9.4                                   | 885     | N.D.                                  | N.D.                      |
| NIR-GECO2 <sup>7</sup> | ND                 | 678                | 704                | 18000                     | 67000             | 0.014             | 0.059             | -15.0                                  | 331     | N.D.                                  | N.D.                      |

2

N.D., not determined.

3

4

1 **Supplementary Table S3 Photophysical properties of FPs or SmFPs with emission over 640**  
 2 **nm.**

| FPs or SmFPs            | $\lambda_{Ex}(nm)$ | $\lambda_{Em}(nm)$ | $\epsilon(M^{-1}cm^{-1})$ | $\Phi FI (%)$ | Intensity (relative to EGFP) |
|-------------------------|--------------------|--------------------|---------------------------|---------------|------------------------------|
| EGFP <sup>8</sup>       | 488                | 507                | 56,000                    | 60            | 100                          |
| SmFP643                 | 626                | 643                | 69,000                    | 64            | 131                          |
| SmFP680                 | 665                | 680                | 72,000                    | 51            | 109                          |
| SmFP700                 | 680                | 700                | 78,000                    | 43            | 100                          |
| mPlum <sup>9</sup>      | 590                | 649                | 41,000                    | 10            | 12                           |
| IIFP1.4 <sup>10</sup>   | 684                | 708                | 92,000                    | 7             | 19                           |
| IIFP2.0 <sup>11</sup>   | 690                | 711                | 86,000                    | 8             | 20                           |
| mNeptune <sup>12</sup>  | 600                | 650                | 67,000                    | 20            | 40                           |
| NirFP <sup>13</sup>     | 605                | 670                | 15,700                    | 6             | 3                            |
| TagRFP675 <sup>14</sup> | 598                | 675                | 46,000                    | 8             | 11                           |
| TagRFP657 <sup>15</sup> | 611                | 657                | 34,000                    | 10            | 10                           |
| iRFP <sup>16</sup>      | 690                | 713                | 98,000                    | 6             | 18                           |
| iRFP670 <sup>16</sup>   | 643                | 670                | 114,000                   | 11            | 37                           |
| iRFP682 <sup>16</sup>   | 663                | 682                | 90,000                    | 11            | 29                           |
| iRFP702 <sup>16</sup>   | 673                | 702                | 93,000                    | 8             | 22                           |
| iRFP720 <sup>16</sup>   | 702                | 720                | 96,000                    | 6             | 17                           |
| mCardinal <sup>17</sup> | 604                | 659                | 87,000                    | 19            | 49                           |
| mIFP <sup>18</sup>      | 683                | 704                | 82,000                    | 8             | 20                           |
| TDsmURFP <sup>19</sup>  | 642                | 670                | 170,000                   | 18            | 91                           |
| miRFP670 <sup>20</sup>  | 642                | 670                | 71,000                    | 12            | 25                           |
| mMaroon1 <sup>21</sup>  | 609                | 657                | 80,000                    | 11            | 26                           |
| mGarnet2 <sup>22</sup>  | 598                | 671                | 105,000                   | 8.7           | 27                           |

3

1 **Supplementary Table S4 SmFP485 data collection and refinement statistics**

2 X-ray data were collected for 180° at BL17U, SSRF. Data were processed by HKL20001. The  
 3 SmFP485 crystal belongs to space group  $P2_12_12_1$  with unit cell parameters of  $a = 69.98 \text{ \AA}$ ,  $b =$   
 4  $90.96 \text{ \AA}$ ,  $c = 52.89 \text{ \AA}$ ,  $\alpha = 90^\circ$ ,  $\beta = 90^\circ$ ,  $\gamma = 90^\circ$ .

|                                |                                     |
|--------------------------------|-------------------------------------|
| Wavelength (Å)                 | 0.97915                             |
| Resolution range               | 90.96-2.09 (2.14-2.09) <sup>a</sup> |
| Space group                    | $P_{212121}$                        |
| Unit cell                      | 69.98 90.96 52.89 90 90 90          |
| Total reflections              | 147156                              |
| Unique reflections             | 20618 (1506)                        |
| Multiplicity                   | 7.1 (7.3)                           |
| Completeness (%)               | 99.8 (100.0)                        |
| Mean I/sigma(I)                | 18.6 (2.2)                          |
| R-merge (%)                    | 7.6 (110.7)                         |
| Reflections used in refinement | 20565                               |
| Reflections used for R-free    | 1051                                |
| R-work/R-free                  | 0.2157/0.2682                       |
| Number of non-hydrogen atoms   | 2424                                |
| macromolecules                 | 2258                                |
| ligands                        | 64                                  |
| Protein residues               | 309                                 |
| RMS(bonds)                     | 0.014                               |
| RMS(angles)                    | 1.160                               |
| Ramachandran favored (%)       | 98.61                               |
| Ramachandran allowed (%)       | 3.05                                |
| Ramachandran outliers (%)      | 0.34                                |
| Average B-factor               | 45.69                               |
| macromolecules                 | 44.99                               |
| ligands                        | 68.71                               |
| solvent                        | 46.65                               |

5 <sup>a</sup>Statistics for the highest-resolution shell are shown in parentheses.

6  
 7  
 8

1  
2

**Supplementary Table S5 Photophysical properties of fluorogenic probes for different self-labeling tags**

| Dye          | Protein  | $\lambda_{ab}(nm)$ | $\lambda_{Ex}(nm)$ | $\lambda_{Em}(nm)$ | $\epsilon(M^{-1}cm^{-1})$ | $\Phi FI$ | Fluorogenicity (fold) <sup>a</sup> | Reference         |
|--------------|----------|--------------------|--------------------|--------------------|---------------------------|-----------|------------------------------------|-------------------|
| BG-MR 121    | SNAP-tag | 660                | N.D.               | 675                | N.D.                      | 0.3       | 17.8                               | Ref <sup>23</sup> |
| BG-ATTO 655  | SNAP-tag | 663                | N.D.               | 684                | N.D.                      | 0.3       | 13.5                               |                   |
| BG-ATTO 680  | SNAP-tag | 680                | N.D.               | 700                | 35000                     | 0.3       | 28.0                               |                   |
| BG-ATTO 700  | SNAP-tag | 700                | N.D.               | 719                | 44000                     | 0.25      | 31.6                               |                   |
| DRBG-488     | SNA-Ptag | N.D.               | 490                | 525                | N.D.                      | N.D.      | 300                                | Ref <sup>24</sup> |
| CBG-488-TQ2  | SNAP-tag | N.D.               | 490                | 525                | N.D.                      | N.D.      | 76.9                               | Ref <sup>25</sup> |
| CBG-549-QSY7 | SNAP-tag | N.D.               | 560                | 575                | N.D.                      | N.D.      | 62.5                               |                   |
| MaP555       | SNAPtag  | 556                | N.D.               | 576                | 54000                     | 0.46      | 21                                 | Ref <sup>26</sup> |
| BG-SBD       | SNAP-tag | 435                | N.D.               | 516                | 13000                     | 0.143     | 280                                | Ref <sup>27</sup> |
| BG-CCVJ      | MGMT     | N.D.               | N.D.               | 504                | N.D.                      | N.D.      | 170                                | Ref <sup>28</sup> |
| 4c           | SNAP-tag | 534                | 530                | 623                | 24768                     | N.D.      | 90                                 | Ref <sup>29</sup> |
| 3            | HaloTag  | 533                | 530                | 630                | 39049                     | 0.22      | N.D.                               | Ref <sup>30</sup> |
| D1-HTL       | HaloTag  | N.D.               | N.D.               | 508                | 14850                     | 0.23      | 200                                | Ref <sup>31</sup> |
| D2-HTL       | HaloTag  | N.D.               | N.D.               | 508                | 11550                     | 0.14      | 150                                |                   |
| P4           | HaloTag  | 423                | N.D.               | 545                | 4100                      | 0.16      | 100                                | Ref <sup>32</sup> |
| P8           | HaloTag  | 440                | N.D.               | 535                | 7800                      | 0.37      | 600                                |                   |
| P9           | HaloTag  | 450                | N.D.               | 530                | 5100                      | 0.47      | 1000                               |                   |
| CCVJ-Halo    | HaloTag  | 458                | N.D.               | 498                | 31800                     | 0.014     | 15                                 | Ref <sup>33</sup> |
| Y-Halo       | HaloTag  | 489                | N.D.               | 562                | 34900                     | 0.015     | 12                                 |                   |

|                   |         |     |      |     |         |       |      |                   |
|-------------------|---------|-----|------|-----|---------|-------|------|-------------------|
| Orange-Halo       | HaloTag | 487 | N.D. | 574 | 16200   | 0.02  | 48   |                   |
| Red-Halo2-PEG     | HaloTag | 504 | N.D. | 588 | 14500   | 0.05  | 32   |                   |
| Red-Halo2         | HaloTag | 515 | N.D. | 592 | 21000   | 0.17  | 156  |                   |
| NIR-Halo1         | HaloTag | 526 | N.D. | 671 | 25800   | 0.053 | 130  |                   |
| SiR-SNAP          | SNAPtag | 650 | N.D. | 668 | ~100000 | 0.30  | N.D. | Ref <sup>34</sup> |
| SiR-CLIP          | CLIPtag | 652 | N.D. | 668 | ~100000 | 0.46  | N.D. |                   |
| SiR-Halo          | HaloTag | 648 | N.D. | 668 | ~100000 | 0.39  | N.D. |                   |
| 520R              | HaloTag | 521 | N.D. | 546 | 52000   | 0.79  | N.D. | Ref <sup>35</sup> |
| 580R              | HaloTag | 581 | N.D. | 607 | 58000   | 0.95  | N.D. |                   |
| 610CP             | Halotag | 609 | N.D. | 634 | 100000  | 0.59  | N.D. |                   |
| JF <sub>503</sub> | HaloTag | 503 | N.D. | 529 | 83000   | 0.87  | N.D. | Ref <sup>36</sup> |
| JF <sub>519</sub> | HaloTag | 519 | N.D. | 546 | 59000   | 0.85  | N.D. |                   |
| JF <sub>525</sub> | HaloTag | 525 | N.D. | 549 | 94000   | 0.91  | N.D. |                   |
| JF <sub>549</sub> | HaloTag | 549 | N.D. | 571 | 101000  | 0.88  | N.D. |                   |
| JF <sub>585</sub> | HaloTag | 585 | N.D. | 609 | 1500    | 0.78  | N.D. |                   |
| JF <sub>608</sub> | HaloTag | 608 | N.D. | 631 | 99000   | 0.67  | N.D. |                   |
| JF <sub>635</sub> | HaloTag | 635 | N.D. | 652 | ~400    | 0.56  | N.D. |                   |
| JF <sub>646</sub> | HaloTag | 646 | N.D. | 664 | 5000    | 0.54  | N.D. |                   |
| SiRcB             | BL-tag  | 654 | N.D. | 671 | 100000  | 0.39  | 135  | Ref <sup>37</sup> |
| SiRcB2            | BL-tag  | 651 | N.D. | 670 | 100000  | 0.38  | 250  |                   |
| SiRcB4            | BL-tag  | 651 | N.D. | 670 | 100000  | 0.39  | 345  |                   |

|                    |          |      |      |     |        |      |                     |                   |
|--------------------|----------|------|------|-----|--------|------|---------------------|-------------------|
| SiRcB6             | BL-tag   | 651  | N.D. | 670 | 100000 | 0.37 | 350                 |                   |
| P1                 | AgHalo   | 440  | N.D. | 545 | N.D.   | N.D. | ~50 (59°C, 30 min)  | Ref <sup>38</sup> |
| P2                 | AgHalo   | 440  | N.D. | 495 | N.D.   | N.D. | ~112 (59°C, 30 min) | Ref <sup>39</sup> |
| MaP510             | HaloTag  | 510  | N.D. | 531 | 61000  | 0.77 | 18                  | Ref <sup>26</sup> |
| MaP555             | HaloTag  | 558  | N.D. | 578 | 87000  | 0.54 | 35                  |                   |
| MaP618             | HaloTag  | 618  | N.D. | 635 | 107000 | 0.61 | 1000                |                   |
| MaP700             | HaloTag  | 700  | N.D. | 720 | 52000  | 0.24 | 650                 |                   |
| JF <sub>669</sub>  | HaloTag  | 669  | N.D. | 682 | 112000 | 0.37 | N.D.                | Ref <sup>40</sup> |
| JF <sub>690</sub>  | HaloTag  | 690  | N.D. | 707 | 150000 | 0.24 | N.D.                |                   |
| JF <sub>711</sub>  | HaloTag  | 711  | N.D. | 732 | 12400  | 0.17 | N.D.                |                   |
| JF <sub>722</sub>  | HaloTag  | 722  | N.D. | 743 | 87200  | 0.11 | N.D.                |                   |
| JF <sub>724</sub>  | HaloTag  | 724  | N.D. | 748 | 6600   | 0.05 | N.D.                |                   |
| JFX <sub>646</sub> | HaloTag  | 645  | N.D. | 662 | 8600   | 0.73 | N.D.                | Ref <sup>41</sup> |
| JFX <sub>650</sub> | HaloTag  | 650  | N.D. | 667 | 17600  | 0.53 | N.D.                |                   |
| TMP455             | DHFR-Tag | N.D. | 380  | 455 | 34000  | 0.78 | 650                 | Ref <sup>42</sup> |
| TMP465             | DHFR-Tag | N.D. | 403  | 465 | 35000  | 0.50 | 1125                |                   |
| TMP485             | DHFR-Tag | N.D. | 415  | 485 | 35000  | 0.49 | 4000                |                   |
| TMP525             | DHFR-Tag | N.D. | 512  | 522 | 60000  | 0.65 | 1600                |                   |

N.D., not determined

1  
2  
3  
4

## 1 Supplementary Note Fluorophore synthesis

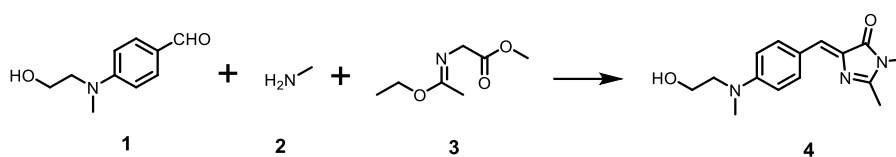

**Compound 4:** To a stirred solution of 4-((2-Hydroxyethyl)(methyl)amino)benzaldehyde (compound 1) (0.90 g, 5.0 mmol) and 5 mL 33% methylamine (compound 2) methanol solution in 50 mL anhydrous methanol, 10 g Na<sub>2</sub>SO<sub>4</sub> was added in one portion. The obtained mixture was stirred and kept at room temperature for 24 hr, then filtered and dried with additional Na<sub>2</sub>SO<sub>4</sub>. The solvent was removed under reduce pressure to give the intermediate which was used directly without any further purification. After re-dissolved in 10 mL anhydrous methanol, ethyl((1-methoxy)amino)acetate (compound 3)<sup>43</sup> (0.95 g, 6 mmol) was added. The complex was stirred and kept at room temperature for 12 hr, the precipitated product was filtered and washed with cooled methanol to give the yellow compound 4. (1.02 g, yield 75%). <sup>1</sup>H NMR (400 MHz, DMSO-*d*<sub>6</sub>): δ=8.03 (d, J=8.8 Hz, 2 H), 6.85 (s, 1 H), 6.74 (d, J=8.8 Hz, 2 H), 4.74(t, J=5.6 Hz, 1 H), 3.56(t, J=6.0 Hz, 2 H), 3.48(t, J=6.0 Hz, 2 H), 3.07(s, 3 H), 3.01 (s, 3 H), 2.31 (s, 3 H). <sup>13</sup>C NMR (100 MHz, DMSO-*d*<sub>6</sub>): δ= 169.57, 160.11, 150.33, 134.37, 133.78, 126.35, 121.16, 111.30, 58.09, 53.75, 38.64, 26.05, 15.13. MS(ESI): m/z Calcd. For C<sub>15</sub>H<sub>19</sub>N<sub>3</sub>O<sub>2</sub> 273.3; found 274.3, [M+H]<sup>+</sup>.

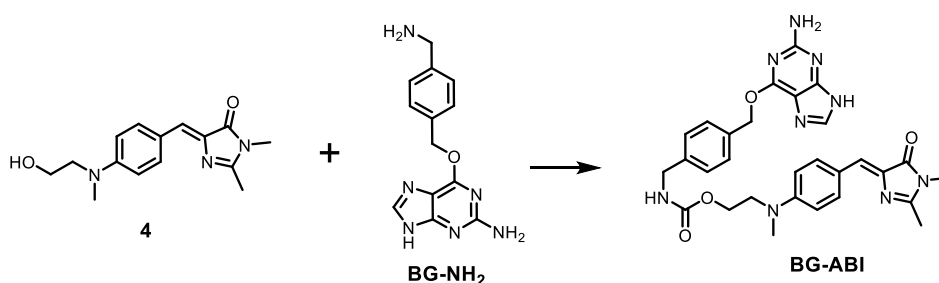

**Compound BG-ABI:** To a stirred solution of compound 4 (0.273 g, 1.0 mmol) and 4-dimethylaminopyridine (DMAP) (0.147 g, 1.2 mmol) in 20 mL dry CH<sub>2</sub>Cl<sub>2</sub>, 4-nitrophenylchloroformate (0.302 g, 1.5 mmol) in 10 mL dry CH<sub>2</sub>Cl<sub>2</sub> was added dropwise. The obtained mixture was stirred and kept at room temperature for 2 hr. The solvent was removed under reduced pressure and the obtained intermediate was used directly without any further purification. After re-dissolved in dry dimethylformamide (DMF), BG-NH<sub>2</sub><sup>44</sup> (0.324 g, 1.2 mmol) and 0.2 mL TEA were added. The obtained mixture was stirred at room temperature for another 1 hr. The solvent was removed under reduced pressure to give the crude product which was purified by silica gel chromatography to give the yellow BG-HBI. (0.512 g, yield 90%).



1  $^1\text{H}$  NMR (400 MHz, DMSO- $d_6$ ):  $\delta$  = 8.05 (d,  $J$  = 8.8 Hz, 2H), 7.95 (s, 1H), 7.82 (s, 1H), 7.74 (t,  $J$  =  
 2 6.0 Hz, 1H), 7.43 (d,  $J$  = 8.0 Hz, 2H), 7.22 (d,  $J$  = 8.0 Hz, 2H), 6.86 (s, 1H), 6.78 (d,  $J$  = 8.8 Hz, 2H),  
 3 6.29 (s, 2H), 5.42 (s, 3H), 4.19 – 4.12 (m, 4H), 3.64 (t,  $J$  = 5.6 Hz, 2H), 2.88 (s, 3H), 2.72 (s, 3H),  
 4 2.30 (s, 3H).  $^{13}\text{C}$  NMR (100 MHz, DMSO- $d_6$ ):  $\delta$  = 169.65, 162.29, 160.41, 159.59, 156.31, 156.21,  
 5 150.58, 150.15, 139.54, 136.61, 135.28, 135.13, 134.65, 133.86, 128.53, 126.95, 126.31,  
 6 121.64, 121.31, 111.46, 111.06, 66.53, 61.02, 51.95, 50.38, 45.42, 43.50, 40.39, 38.33, 35.74,  
 7 30.72, 26.07, 15.13, 14.69, 8.86, 7.13. HR-MS (ESI):  $m/z$  Calcd. For  $\text{C}_{29}\text{H}_{31}\text{N}_9\text{O}_4$  569.2499; found  
 8 589.2497,  $[\text{M}+\text{Na}]^+$ .

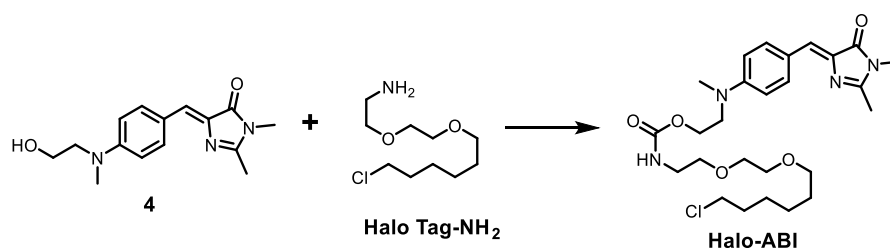

9  
 10 **Compound Halo-ABI:** To a stirred solution of compound 4 (0.273 g, 1.0 mmol) and DMAP  
 11 (0.147 g, 1.2 mmol) in 20 mL dry  $\text{CH}_2\text{Cl}_2$ , 4-nitrophenylchloroformate (0.302 g, 1.5 mmol) in 10  
 12 mL dry  $\text{CH}_2\text{Cl}_2$  was added dropwise. The obtained mixture was stirred and kept at room  
 13 temperature for 2 hr, then Halo Tag-NH $_2$ <sup>45</sup> (0.368 g, 1.2 mmol) in 5 mL dry  $\text{CH}_2\text{Cl}_2$  was added.  
 14 The mixture was stirred at room temperature for another 30 min. The solvent was removed  
 15 under reduce pressure to give the crude product which was purified with gel silica gel column  
 16 chromatography to afford the yellow Halo-HBI. (0.450 g, yield 86%).  $^1\text{H}$  NMR (400 MHz, DMSO-  
 17  $d_6$ ):  $\delta$  = 8.05 (d,  $J$ =8.8 Hz, 2 H), 7.18(t,  $J$ =5.6 Hz, 1 H), 6.86(s, 1 H), 6.77 (d,  $J$ =8.8 Hz, 2 H), 4.11 (t,  
 18  $J$ =5.6 Hz, 2 H), 3.59-3.63(m, 4 H), 3.40-3.47 (m, 4 H), 3.30-3.38 (m, 2 H), 3.07-3.11 (m, 5 H),  
 19 3.00 (s, 3 H), 2.31 (s, 3 H), 1.65-1.72 (m, 2 H), 1.44-1.50 (m, 2 H), 1.19-1.40 (m, 6 H).  $^{13}\text{C}$  NMR  
 20 (100 MHz, DMSO- $d_6$ ):  $\delta$  = 169.38, 160.16, 155.86, 149.85, 134.43, 133.60, 126.01, 121.41,  
 21 111.21, 69.89, 69.26, 69.13, 68.80, 60.64, 50.14, 45.89, 38.17, 31.73, 28.77, 25.84, 24.63,  
 22 14.93. HR-MS (ESI): $m/z$  Calcd. For  $\text{C}_{26}\text{H}_{39}\text{ClN}_4\text{O}_5$  522.2609; found 523.2605,  $[\text{M}+\text{H}]^+$ .

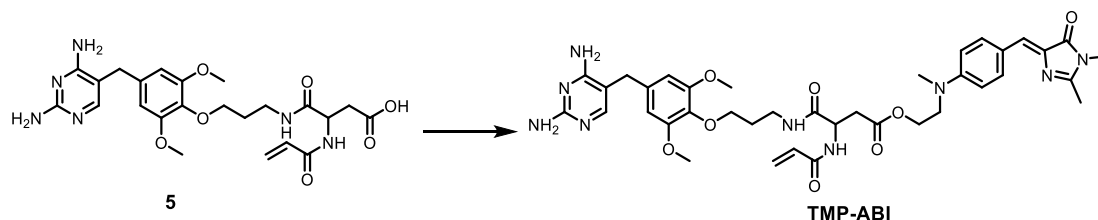

23  
 24 **Compound TMP-ABI:** To a stirred solution of compound 4 (0.328 g, 1.2 mmol), DMAP  
 25 (73.2 mg, 0.6 mmol) and 1-ethyl-3-(3-dimethylaminopropyl) carbodiimide (EDCI) (0.115 g, 0.6  
 26 mmol) in 5 mL anhydrous DMF, compound 5<sup>46</sup> (0.256 g, 5 mmol) was added and kept at room

1 temperature. The obtained mixture was stirred for 1 hr. The solvent was removed under  
2 reduce pressure to give the crude product which was purified by silica gel flash  
3 chromatography to give the TMP-ABI. (0.31 g, 81%). <sup>1</sup>H NMR (400 MHz, DMSO-*d*<sub>6</sub>): δ= 8.03 (d,  
4 J=8.8 Hz, 2 H), 7.25 (s, 2 H), 6.85 (s, 1 H), 6.74 (d, J=8.8 Hz, 2 H), 6.57 (s, 2 H), 6.24 (dd, J=16.8  
5 Hz, 9.0 Hz, 1 H), 6.16 (dd, J=16.8 Hz, 9.0 Hz, 1 H), 5.61 (dd, J=8.8 Hz, 3.0 Hz, 1 H), 4.8 (m, 1  
6 H), 4.74 (t, J=5.6 Hz, 1 H), 3.98 (m, 2 H), 3.82 (s, 6 H), 3.56(t, J=6.0 Hz, 2 H), 3.48(t, J=6.0 Hz, 2  
7 H), 3.46 (t, J=6.0 Hz, 2 H), 3.07 (s, 3 H), 3.01 (s, 3 H), 2.31 (s, 3 H), 2.87 (dd, J=16.8 Hz, 6 Hz, 1  
8 H), 2.72 (dd, J=16.8, 7.2 Hz, 1 H), 1.88 (m, 2 H). HR-MS (ESI): m/z Calcd. For C<sub>38</sub>H<sub>47</sub>N<sub>9</sub>O<sub>8</sub>  
9 757.3548; found 780.3550, [M+Na]<sup>+</sup>.

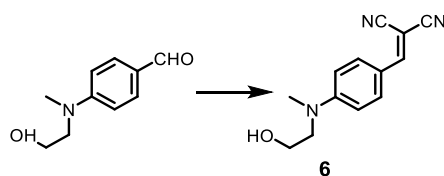

11

12 **Compound 6:** To a stirred solution of 4-((2-Hydroxyethyl) (methyl) amino) benzaldehyde  
13 (0.18 g, 1.0 mmol) and malononitrile (0.079 g, 1.2 mmol) in 10 mL anhydrous methanol, a  
14 catalytic amount (2 drops) of piperidine was added. The obtained mixture was stirred and kept  
15 at 80 °C for 15 min under protection of N<sub>2</sub>. After cooling to room temperature, the solvent was  
16 removed under reduce pressure to give the crude product which was purified by silica gel  
17 column chromatography to afford the yellow compound 6. (0.22 g, yield 98%). <sup>1</sup>H NMR (400  
18 MHz, DMSO-*d*<sub>6</sub>): δ= 8.08 (s, 1H), 7.96 (s, 1H), 7.84 (d, J = 8.8 Hz, 2H), 7.76 (t, J = 6.2 Hz, 3H),  
19 7.44 (d, J = 8.0 Hz, 2H), 7.21 (d, J = 8.0 Hz, 2H), 6.91 (d, J = 9.2 Hz, 2H), 5.46 (s, 1H), 4.22-4.11  
20 (m, 2H), 3.74 (t, J = 5.4 Hz, 2H), 3.09 (s, 3H). <sup>13</sup>C NMR (100 MHz, DMSO-*d*<sub>6</sub>): δ= 158.87, 156.12,  
21 153.73, 139.52, 134.87, 133.55, 118.97, 116.10, 115.36, 68.92, 66.86, 61.01, 50.55, 43.52,  
40.35, 38.69. MS(ESI): m/z Calcd. For C<sub>13</sub>H<sub>13</sub>N<sub>3</sub>O 227.1; found 228.1, [M+H]<sup>+</sup>.

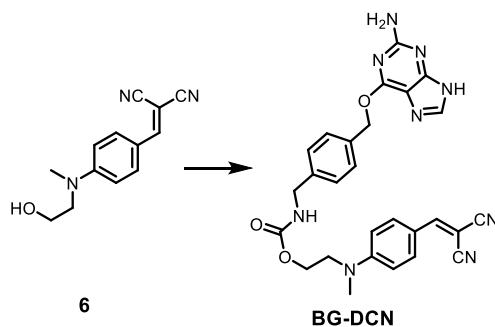

23

24 **Compound BG-DCN:** 4-nitrophenylchloroformate (0.302 g, 1.5 mmol) in 10 mL dry CH<sub>2</sub>Cl<sub>2</sub>  
25 was added dropwise to a solution of compound 6 (0.227 g, 1.0 mmol) and 4-  
dimethylaminopyridine (0.147 g, 1.2 mmol) in 20 mL dry CH<sub>2</sub>Cl<sub>2</sub>. The obtained mixture was

1 stirred and kept at room temperature for 2 hr under the protection of N<sub>2</sub>. The solvent was  
 2 removed under reduce pressure to give the intermediate which was used directly without any  
 3 further purification. After re-dissolved in dry DMF, BG-NH<sub>2</sub> (0.324 g, 1.2 mmol) was added in  
 4 the presence of 0.2 mL TEA. The obtained mixture was stirred and kept at room temperature  
 5 for 1 hr under the protection of N<sub>2</sub>. The solvents were removed under reduce pressure to give  
 6 the crude product which was purified with gel silica gel column chromatography to give the  
 7 yellow BG-DCN. (0.465 g, yield 89%). <sup>1</sup>H NMR (400 MHz, DMSO-*d*<sub>6</sub>): δ= 8.08 (s, 1 H), 7.85 (m,  
 8 3 H), 7.82(t, J=6.0 Hz, 1 H), 7.43 (d, J=8.0 Hz, 2 H), 7.21(d, J=8.0 Hz, 2 H), 6.91 (d, J=8.8 Hz, 2 H),  
 9 6.31 (s, 2 H), 5.45 (s, 2 H), 4.12 (t, J=5.6 Hz, 2 H), 3.74 (t, J=5.6 H, 2 H), 3.08 (s, 3 H). <sup>13</sup>C NMR  
 10 (100 MHz, DMSO-*d*<sub>6</sub>): δ= 159.54, 158.90, 156.19, 153.76, 139.50, 135.16, 133.65, 128.50,  
 11 127.00, 126.16, 119.01, 116.17, 115.77, 115.44, 111.90, 68.99, 66.56, 60.97, 55.99, 50.55,  
 12 45.54, 43.52, 38.68, 18.52. HR-MS(ESI):m/z Calcd. For C<sub>27</sub>H<sub>25</sub>N<sub>3</sub>O<sub>3</sub> 523.2080; found 546.2083,  
 13 [M+Na]<sup>+</sup>.

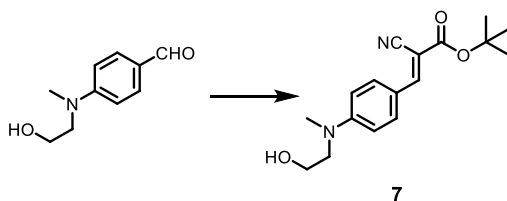

14  
 15 **Compound 7:** To a stirred solution of 4-((2-Hydroxyethyl) (methyl) amino)benzaldehyde  
 16 (0.18 g, 1.0 mmol) and *tert*-butyl cyanoacetate (0.169 g, 1.2 mmol) in 10 mL anhydrous  
 17 methanol, a catalytic amount (2 drops) of piperidine was added. The obtained mixture was  
 18 stirred and kept at 80 °C for 15 min under the protection of N<sub>2</sub>. After cooling to room  
 19 temperature, the solvent was removed under reduce pressure to give the crude product which  
 20 was purified with silica gel column chromatography to afford the yellow compound 7. (0.293  
 21 g, yield 97%). <sup>1</sup>H NMR (400 MHz, DMSO-*d*<sub>6</sub>): δ =8.01 (s, 1 H), 7.92 (d, J =9.0 Hz,2 H), 6.85 (d, J  
 22 =9.0 Hz,2 H), 4.81 (t, J =5.1Hz, 1H), 3.51-3.63(m, 4 H), 3.08 (s, 3 H), 1.51 (s, 9 H). <sup>13</sup>C NMR (100  
 23 MHz, DMSO-*d*<sub>6</sub>): δ=162.47, 153.45, 153.02, 133.59, 118.07, 117.67, 111.60, 93.34, 81.79,  
 24 58.18, 55.97, 53.77, 27.63. MS(ESI):m/z Calcd. For C<sub>17</sub>H<sub>22</sub>N<sub>2</sub>O<sub>3</sub> 302.2; found 303.2, [M+H]<sup>+</sup>.

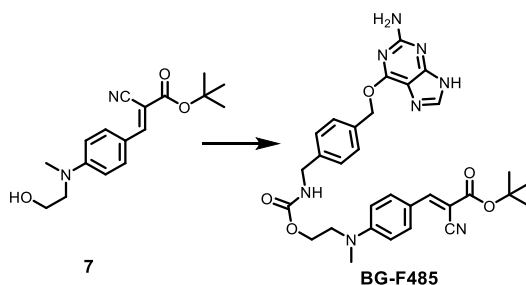

25  
 26 **Compound BG-F485:** To a stirred solution of compound 7 (0.302 g, 1.0 mmol) and 4-

1 dimethylaminopyridine (0.147 g, 1.2 mmol) in 20 mL dry CH<sub>2</sub>Cl<sub>2</sub>, 4-nitrophenylchloroformate  
2 (0.302 g, 1.5 mmol) in 10 mL dry CH<sub>2</sub>Cl<sub>2</sub> was added dropwise. The obtained mixture was stirred  
3 and kept at room temperature for 2 hr under the protection of N<sub>2</sub>. The solvent was removed  
4 under reduce pressure to give the intermediate which was used directly without any further  
5 purification. After re-dissolved in dry DMF, BG-NH<sub>2</sub> (0.324 g, 1.2 mmol) was added in the  
6 presence of 0.2 mL TEA. The obtained mixture was stirred at room temperature for another 1  
7 hr. The solvent was removed under reduce pressure to give the crude production which was  
8 purified by gel silica gel column chromatography to afford the yellow BG-F485. (0.556 g, yield  
9 93%). <sup>1</sup>H NMR (400 MHz, DMSO-*d*<sub>6</sub>): δ = 12.46 (br, 1 H), 10.25 (br, 1 H), 8.01 (s, 1 H), 7.92 (d,  
10 J=9.2 Hz, 2 H), 7.81 (s, 1 H), 7.45 (d, J=8.0 Hz, 2 H), 7.27 (d, J=8.0 Hz, 2 H), 6.84 (d, J=9.2 Hz, 2  
11 H), 6.28 (br, 2 H), 5.44 (s, 2 H), 4.27 (d, J=6.0 Hz, 2 H), 3.42-3.47 (m, 4 H), 3.03 (s, 3 H), 1.49 (s,  
12 9 H). <sup>13</sup>H NMR (100 MHz, DMSO-*d*<sub>6</sub>): δ=171.48, 162.44, 159.53, 158.28, 153.47, 152.67, 139.42,  
13 135.15, 133.68, 128.49, 127.27, 118.10, 117.64, 111.50, 93.39, 81.81, 86.45, 55.94, 54.38,  
14 50.93, 45.26, 41.91, 41.82, 27.62, 8.32. HR-MS(ESI): m/z Calcd. For C<sub>31</sub>H<sub>34</sub>N<sub>8</sub>O<sub>5</sub> 598.2652;  
15 found 621.2620, [M+Na]<sup>+</sup>.

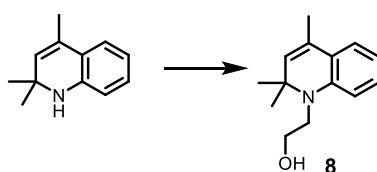

16  
17 **Compound 8:** To a stirred solution of 2,2,4-trimethyl-1,2-dihydro quinolone (0.866 g,  
18 5.0 mmol), 2-bromoethanol (0.750 g, 6.0 mmol) and in 100 mL anhydrous CH<sub>3</sub>CN, K<sub>2</sub>CO<sub>3</sub> (1.380  
19 g, 10.0 mmol) was added in one portion. The obtained mixture was refluxed for 12 hr under  
20 the protection of N<sub>2</sub>. After cooling to room temperature, the mixture was filtered and washed  
21 with CH<sub>3</sub>CN. The solvent was removed under reduce pressure to give the crude product which  
22 was purified by silica gel column chromatography to afford the compound 8. (0.857 g, yield  
23 79%). <sup>1</sup>H NMR (400 MHz, DMSO-*d*<sub>6</sub>): δ= 7.02 (td, J =7.0Hz, 1 H), 6.97 (dd, J =7.5, 1.5Hz,1 H),  
24 6.48-6.59(m, 2 H), 5.28 (d, J =1.2Hz, 1 H), 4.76 (t, J =5.6Hz, 1 H), 3.46 (dd, J =12.6, 7.0Hz, 2 H),  
25 3.29 (t, J =7.2Hz, 2 H), 1.89 (d, J =1.2Hz, 3 H), 1.24 (s, 6 H). <sup>13</sup>H NMR (100 MHz, DMSO-*d*<sub>6</sub>):  
26 δ=143.66, 129.30, 128.60, 126.93, 123.38, 122.08, 115.34, 110.10, 58.53, 55.90, 45.59, 28.09,  
27 18.26. MS(ESI):m/z Calcd. For C<sub>14</sub>H<sub>19</sub>NO 217.1; found 218.1, [M+H]<sup>+</sup>.

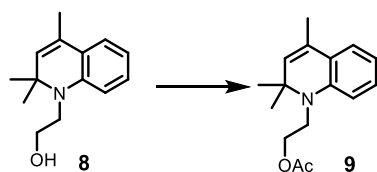

28

1        **Compound 9:** Acetic anhydride (0.11 g, 1.0 mmol) was added to the solution of  
2 compound 8 (0.217 g, 1.0 mmol) and 4-dimethylaminopyridine (0.144 g, 1.2 mmol) in dry  
3 CH<sub>2</sub>Cl<sub>2</sub> at 0 °C. After addition, the mixture was warmed to room temperature and stirred for a  
4 further 1 hr. The reaction mixture was quenched with 1 mL water and extracted with CH<sub>2</sub>Cl<sub>2</sub>,  
5 then dried with Na<sub>2</sub>SO<sub>4</sub>. The solvent was removed under reduced pressure to give the crude  
6 product which was purified by silica gel column to afford the yellow compound 9. (0.254 g,  
7 yield 98%). <sup>1</sup>H NMR (400 MHz, DMSO-*d*<sub>6</sub>): δ= 6.95-7.09 (m, 2 H), 6.54-6.63 (m, 2 H), 5.31 (d, J  
8 =1.2 Hz, 1 H), 4.07 (t, J =6.8 Hz, 2 H), 3.45 (t, J =6.8 Hz, 2 H), 2.03 (s, 3 H), 1.90 (d, J=1.2 Hz, 3  
9 H), 1.24 (s, 6 H). <sup>13</sup>C NMR (100 MHz, DMSO-*d*<sub>6</sub>): δ=170.28, 143.18, 129.41, 128.59, 126.89,  
10 123.44, 122.41, 115.93, 110.10, 60.97, 56.01, 41.49, 27.72, 20.55, 18.15. MS(ESI): m/z Calcd.  
11 For C<sub>16</sub>H<sub>21</sub>NO<sub>2</sub> 259.2; found 260.2, [M+H]<sup>+</sup>.

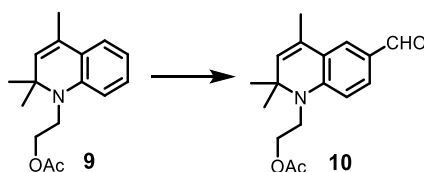

13        **Compound 10:** Phosphorous oxychloride (0.22 mL, 2.32 mmol) was added dropwise to a  
14 stirred 0 °C solution of compound 9 (0.50 g, 1.93 mmol) in 20 mL dry CH<sub>2</sub>Cl<sub>2</sub> and 2 mL DMF  
15 under the protection of N<sub>2</sub>. The obtained mixture was warmed to room temperature and  
16 stirred for a further 5 hr. The mixture was quenched with a saturated solution of sodium  
17 carbonate and extracted with CH<sub>2</sub>Cl<sub>2</sub>. The organic layer was dried over Na<sub>2</sub>SO<sub>4</sub>, then the  
18 solvent was removed under reduced pressure to give the crude produce which was purified  
19 by silica gel column chromatography to afford compound 10. (0.477 g, yield 86%). <sup>1</sup>H NMR  
20 (400 MHz, DMSO-*d*<sub>6</sub>): δ= 9.67 (s, 1 H), 7.59 (dd, J =8.4, 2.0 Hz, 1 H), 7.47 (d, J =2.0 Hz, 1 H), 6.77  
21 (d, J =8.8 Hz, 1 H), 5.45 (d, J =1.2 Hz, 1 H), 4.13 (t, J =6.8 Hz, 2 H), 3.62 (t, J =6.8 Hz, 2H), 2.04  
22 (s, 3 H), 1.96 (d, J =1.0 Hz, 3 H), 1.33(s, 6 H). <sup>13</sup>C NMR (100 MHz, DMSO-*d*<sub>6</sub>): δ=189.45, 170.30,  
23 148.53, 130.03, 125.92, 124.92, 121.21, 109.94, 60.55, 57.49, 41.83, 28.64, 20.59, 18.03.  
24 MS(ESI):m/z Calcd. For C<sub>17</sub>H<sub>21</sub>NO<sub>3</sub> 287.2; found 288.2, [M+H]<sup>+</sup>.

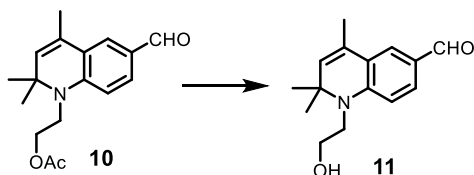

26        **Compound 11:** 2 mL saturated solution of sodium carbonate was added to a stirred  
27 solution of compound 10 (0.4 g, 1.39 mmol) in 20 mL methanol. The obtained mixture was  
28 stirred and kept room temperature for 2 hr under the protection of N<sub>2</sub>. The solvents were

1 removed under reduce pressure, then the residue was re-dissolved in 50 mL CH<sub>2</sub>Cl<sub>2</sub> and  
 2 washed with a saturated solution of NaCl; the organic layer was dried over Na<sub>2</sub>SO<sub>4</sub>, filtered  
 3 and removed the solvent under reduce pressure to give the crude product which was purified  
 4 by silica gel column chromatography to afford the compound 11. (0.341 g, yield 100%). <sup>1</sup>H  
 5 NMR (400 MHz, DMSO-*d*<sub>6</sub>): δ= 9.64 (s, 1 H), 7.57 (dd, J =8.8, 2.0 Hz, 1 H), 7.44 (d, J =2.0 Hz, 1  
 6 H), 6.69 (d, J =8.8 Hz, 1 H), 5.42 (d, J =1.2 Hz, 1 H), 4.88 (bt, 1 H), 3.46-3.56 (t, 2H), 3.39-3.47 (t,  
 7 2 H), 1.94 (d, J =1.2 Hz, 3 H), 1.33(s, 6H). <sup>13</sup>H NMR (100 MHz, DMSO-*d*<sub>6</sub>): δ=189.42, 148.60,  
 8 132.04, 129.62, 125.70, 124.17, 123.99, 120.96, 109.59, 57.89, 57.13, 55.74, 45.59, 28.72,  
 9 17.84. MS(ESI): m/z Calcd. For C<sub>15</sub>H<sub>19</sub>NO<sub>2</sub> 245.1; found 246.1, [M+H]<sup>+</sup>.

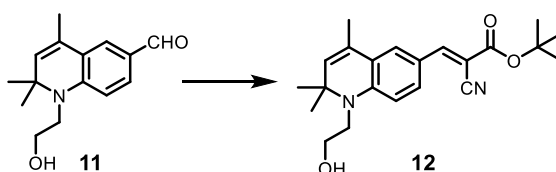

10

11 **Compound 12:** This compound was obtained by following the general procedure for  
 12 compound 7. (0.215 g, yield 93%). <sup>1</sup>H NMR (400 MHz, DMSO-*d*<sub>6</sub>): δ= 8.00 (s, 1 H), 7.81 (d, J =2.0  
 13 Hz, 1 H), 7.77 (dd, J =9.0, 2.0 Hz, 1 H), 6.72 (d, J =5.2 Hz, 1 H), 5.45 (1H, d, J =1.2 Hz), 3.42-3.54  
 14 (m, 4H), 1.92 (d, J =1.2 Hz, 3 H), 1.50 (s, 9H), 1.35 (s, 6H). <sup>13</sup>H NMR (100 MHz, DMSO-*d*<sub>6</sub>):  
 15 δ=162.22, 153.20, 148.29, 134.20, 129.84, 126.20, 125.49, 121.11, 118.11, 117.48, 110.28,  
 16 93.35, 81.59, 57.99, 57.59, 45.63, 28.56, 27.41, 17.70. MS(ESI): m/z Calcd. For C<sub>22</sub>H<sub>28</sub>N<sub>2</sub>O<sub>3</sub>  
 17 368.2; found 369.2, [M+H]<sup>+</sup>.

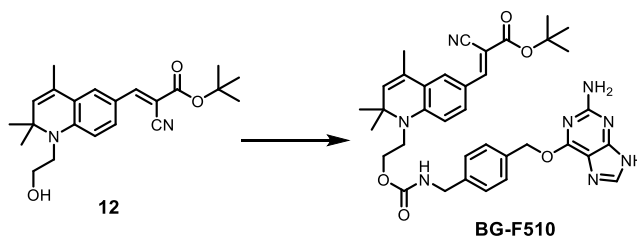

18

19 **Compound BG-F510:** This compound was obtained by following the general procedure  
 20 for BG-F485. (0.245 g, yield 85%). <sup>1</sup>H NMR (400 MHz, DMSO-*d*<sub>6</sub>): δ= 12.42 (br, 1 H), 8.02 (s, 1  
 21 H), 7.82 (s, 2 H), 7.77 (d, J =8.8 Hz, 1 H), 7.45 (d, J =8.0 Hz, 2 H), 7.27 (d, J =8.0 Hz, 2 H), 6.83 (d,  
 22 J =7.2 Hz, 1 H), 6.27 (br, 2 H), 5.45 (s, 2 H), 4.21 (d, J =6.0 Hz, 2 H), 4.09 (t, J =5.6 Hz, 2 H), 3.62 (t,  
 23 2 H, J =5.6 Hz), 1.92 (s, 3 H), 1.49 (s, 9 H), 1.32 (s, 6 H). <sup>13</sup>H NMR (100 MHz, DMSO-*d*<sub>6</sub>): δ=162.36,  
 24 159.59, 156.29, 153.56, 148.36, 139.49, 135.27, 134.36, 130.28, 128.51, 127.10, 126.37,  
 25 125.81, 121.75, 118.85, 117.60, 110.69, 94.24, 81.94, 66.48, 62.77, 60.53, 57.96, 55.99, 45.61,  
 26 43.60, 42.54, 28.83, 27.65, 17.94. HR-MS(ESI): m/z Calcd. For C<sub>36</sub>H<sub>40</sub>N<sub>8</sub>O<sub>5</sub> 664.3122; found  
 27 697.3120, [M+Na]<sup>+</sup>.

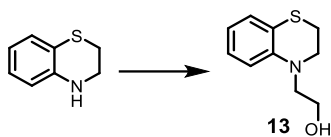

1

2

3

4

5

6

7

**Compound 13:** This compound was obtained by following the general procedure for compound 8. (0.703 g, yield 72%).  $^1\text{H}$  NMR (400 MHz,  $\text{CDCl}_3$ ):  $\delta$  = 7.05 (dd,  $J$  = 7.7, 1.4 Hz, 1H), 7.01 – 6.96 (m, 1H), 6.76 (d,  $J$  = 8.2 Hz, 1H), 6.66 (t,  $J$  = 7.4 Hz, 1H), 4.45 (t,  $J$  = 6.1 Hz, 0H), 3.82 (t,  $J$  = 5.7 Hz, 2H), 3.67 – 3.63 (m, 2H), 3.46 (t,  $J$  = 5.7 Hz, 2H), 3.05 – 3.02 (m, 2H).  $^{13}\text{C}$  NMR (100 MHz,  $\text{CDCl}_3$ )  $\delta$  = 143.48, 127.99, 125.87, 118.67, 118.18, 114.04, 59.68, 55.18, 50.58, 25.49. MS(ESI):  $m/z$  Calcd. For  $\text{C}_{10}\text{H}_{13}\text{NOS}$  195.1; found 196.1,  $[\text{M}+\text{H}]^+$ .

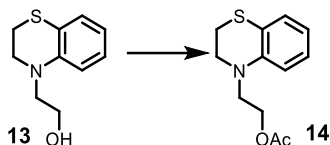

8

9

10

11

12

13

14

**Compound 14:** This compound was obtained by following the general procedure for compound 9. (0.539 g, yield 98%).  $^1\text{H}$  NMR (400 MHz,  $\text{CDCl}_3$ ):  $\delta$  = 7.05 (dd,  $J$  = 7.7, 1.4 Hz, 1H), 7.01 – 6.96 (m, 1H), 6.76 (d,  $J$  = 8.2 Hz, 1H), 6.66 (t,  $J$  = 7.4 Hz, 1H), 3.82 (t,  $J$  = 5.7 Hz, 2H), 3.67 – 3.63 (m, 2H), 3.46 (t,  $J$  = 5.7 Hz, 2H), 3.05 – 3.02 (m, 2H), 2.03 (s, 3 H).  $^{13}\text{C}$  NMR (100 MHz,  $\text{CDCl}_3$ ):  $\delta$  = 143.48, 127.99, 125.87, 118.67, 118.18, 114.04, 109.32, 59.68, 55.18, 50.58, 25.49. MS(ESI):  $m/z$  Calcd. For  $\text{C}_{12}\text{H}_{15}\text{NO}_2\text{S}$  237.1; found 238.1,  $[\text{M}+\text{H}]^+$ .

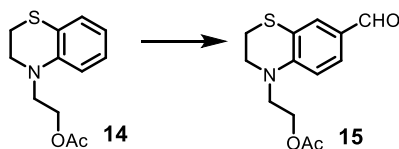

15

16

17

18

19

20

21

**Compound 15:** This compound was obtained by following the general procedure for compound 10. (0.521 g, yield 98%).  $^1\text{H}$  NMR (400 MHz,  $\text{CDCl}_3$ ):  $\delta$  = 9.89 (s, 1 H), 7.06 (dd,  $J$  = 7.7, 1.4 Hz, 1H), 7.01 – 6.90 (m, 1H), 6.78 (d,  $J$  = 8.2 Hz, 1H), 6.69 (t,  $J$  = 7.4 Hz, 1H), 3.82 (t,  $J$  = 5.7 Hz, 2H), 3.67 – 3.60 (m, 2H), 3.45 (t,  $J$  = 5.7 Hz, 2H), 3.05 – 3.02 (m, 2H), 2.02 (s, 3 H).  $^{13}\text{C}$  NMR (100 MHz,  $\text{CDCl}_3$ ):  $\delta$  = 181.2, 143.48, 127.99, 125.87, 118.67, 118.18, 114.04, 109.32, 59.68, 55.18, 50.58, 25.49. MS(ESI):  $m/z$  Calcd. For  $\text{C}_{13}\text{H}_{15}\text{NO}_2\text{S}$  265.1; found 266.1,  $[\text{M}+\text{H}]^+$ .

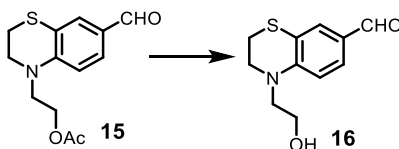

22

23

24

25

**Compound 16:** This compound was obtained by following the general procedure for compound 11. (0.489 g, yield 88%).  $^1\text{H}$  NMR (400 MHz,  $\text{CDCl}_3$ ):  $\delta$  = 9.54 (s, 1H), 7.45 (d,  $J$  = 2.0 Hz, 1H), 7.45 (d,  $J$  = 2.0 Hz, 1H), 7.37 (dd,  $J$  = 8.7, 2.0 Hz, 1H), 7.37 (dd,  $J$  = 8.7, 2.0 Hz, 1H), 6.70

1 (d, J = 8.7 Hz, 1H), 3.89 – 3.81 (m, 4H), 3.57 (t, J = 5.7 Hz, 2H), 3.02 – 2.97 (m, 2H). <sup>13</sup>C NMR  
2 (100 MHz, CDCl<sub>3</sub>): δ=190.07, 148.05, 125.63, 117.02, 111.29, 60.47, 59.42, 54.69, 51.90, 24.42.  
3 MS(ESI):m/z Calcd. For C<sub>11</sub>H<sub>13</sub>NO<sub>2</sub>S 223.01; found 224.1, [M+H]<sup>+</sup>.

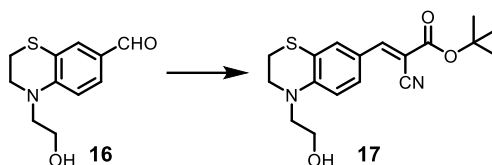

5 **Compound 17:** This compound was obtained by following the general procedure for  
6 compound 7. (0.321 g, yield 94%). <sup>1</sup>H NMR (400 MHz, CDCl<sub>3</sub>): δ=7.82 (s, 1H), 7.69 (dd, J = 9.0,  
7 2.1 Hz, 2H), 7.54 (d, J = 2.2 Hz, 1H), 6.73 – 6.70 (m, 1H), 3.90 – 3.84 (m, 4H), 3.60 (q, J = 5.2 Hz,  
8 4H), 3.03 – 2.98 (m, 4H). <sup>13</sup>C NMR (100 MHz, CDCl<sub>3</sub>): δ= 162.85, 152.88, 147.08, 132.35,  
9 132.22, 130.23, 120.33, 120.15, 117.49, 117.35, 117.22, 111.73, 96.93, 82.80, 59.59, 54.54,  
10 52.17, 52.09, 28.06, 24.41, 24.32. MS(ESI): m/z Calcd. For C<sub>18</sub>H<sub>22</sub>N<sub>2</sub>O<sub>3</sub>S 346.1; found 347.1,  
11 [M+H]<sup>+</sup>.

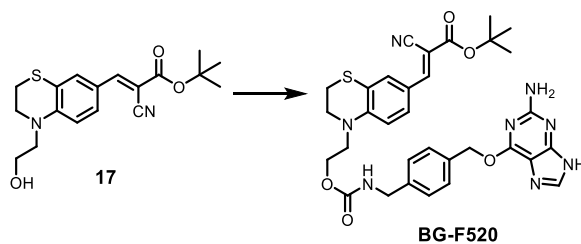

13 **Compound BG-F520:** This compound was obtained by following the general procedure  
14 for BG-F485. (0.212 g, yield 89%). <sup>1</sup>H NMR (400 MHz, DMSO-*d*<sub>6</sub>): δ= 12.43 (s, 1H), 7.99 (s, 1H),  
15 7.81 (s, 1H), 7.77 (d, J = 6.0 Hz, 1H), 7.58 (d, J = 1.8 Hz, 1H), 7.50 (dd, J = 8.7, 1.7 Hz, 1H), 7.43  
16 (d, J = 7.9 Hz, 2H), 7.22 (d, J = 7.9 Hz, 2H), 6.91 (d, J = 8.8 Hz, 1H), 6.30 (s, 1H), 5.76 (s, 1H), 5.44  
17 (s, 1H), 4.23 – 4.11 (m, 6H), 3.68 (t, J = 5.0 Hz, 2H), 3.56 (s, 2H), 1.49 (s, 5H). <sup>13</sup>C NMR (100  
18 MHz, DMSO-*d*<sub>6</sub>): δ=162.74, 160.10, 156.69, 153.94, 142.94, 141.11, 138.24, 129.01, 127.50,  
19 119.62, 117.92, 117.09, 111.30, 95.03, 82.51, 63.72, 55.39, 44.03, 28.12. HR-MS(ESI): m/z  
20 Calcd. For C<sub>32</sub>H<sub>34</sub>N<sub>8</sub>O<sub>5</sub>S, 642.2373; found 665.2371, [M+Na]<sup>+</sup>.

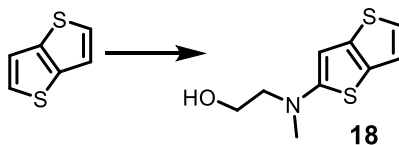

22 **Compound 18:** N-bromosuccinimide (0.64 g, 3.57 mmol) was added to a solution of  
23 thieno[3,2-b]thiophene (0.50 g, 3.57 mmol) in 20 mL DMF. The obtained mixture was stirred  
24 and kept at room temperature for 5 hr under the protection of N<sub>2</sub>. Then, the mixture was pour  
25 into 100 mL water and extracted with CH<sub>2</sub>Cl<sub>2</sub>. The organic layer was dried with Na<sub>2</sub>SO<sub>4</sub>, filtered,



1 and the solvent removed under reduce pressure to obtain intermediate which was used for  
2 the next step without further purification. The intermediate was dissolved in 10 mL 2-  
3 methylaminoethanol, then, CuI (76 mg, 0.4 mmol), K<sub>3</sub>PO<sub>4</sub> (0.829 g, 6.0 mmol), (L)-proline (92  
4 mg, 0.80 mmol) were added and the obtained mixture was stirred overnight at 90 °C. After  
5 cooling to room temperature, 50 mL water was added to the mixture. The mixture was  
6 extracted with CH<sub>2</sub>Cl<sub>2</sub>, dried over Na<sub>2</sub>SO<sub>4</sub>. The solution was filtered and the solvent was  
7 removed under reduce pressure to give the crude product which was purified by silica gel  
8 column chromatography to afford compound 18. (0.556 g, yield 73%). <sup>1</sup>H NMR (400 MHz,  
9 DMSO-*d*<sub>6</sub>): δ= 7.15 (q, J=5.2Hz, 2H), 6.16 (s, 1 H), 4.77 (bt, t, J=5.3Hz,1 H), 3.61 (2H, q, J=5.7Hz),  
10 3.31 (2H, t, J =6.0Hz), 2.95 (3H, s). <sup>13</sup>H NMR (100 MHz, DMSO-*d*<sub>6</sub>): δ=159.71, 138.91, 124.52,  
11 120.09, 119.72, 93.28, 57.91, 57.11, 40.25. MS(ESI): m/z Calcd. For C<sub>9</sub>H<sub>11</sub>NOS<sub>2</sub> 213.0; found  
12 214.0, [M+H]<sup>+</sup>.

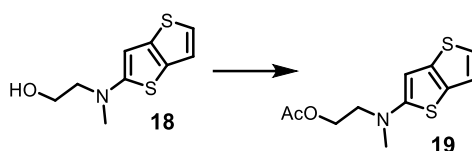

14 **Compound 19:** This compound was obtained by following the general procedure for  
15 compound 9. (0.509 g, yield 95%). <sup>1</sup>H NMR (400 MHz, DMSO-*d*<sub>6</sub>): δ= 7.18 (s, 2 H), 6.24 (s, 1 H),  
16 4.23 (t, J =5.5 Hz, 2 H), 3.50 (t, J =5.5 Hz, 2 H), 2.94 (s, 3 H), 1.97 (s, 3 H). <sup>13</sup>H NMR (100 MHz,  
17 DMSO-*d*<sub>6</sub>): δ=170.03, 158.98, 138.52, 124.79, 120.39, 119.52, 94.23, 60.49, 53.13, 39.76,  
18 20.40. MS(ESI):m/z Calcd. For C<sub>11</sub>H<sub>12</sub>NO<sub>2</sub>S<sub>2</sub> 255.0; found 256.0, [M+H]<sup>+</sup>.

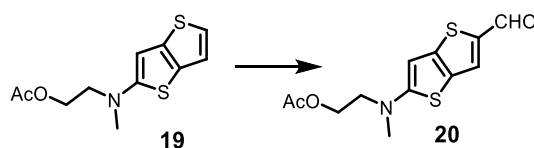

20 **Compound 20:** This compound was obtained by following the general procedure for  
21 compound 10. (0.433 g, yield 79%). <sup>1</sup>H NMR (400 MHz, DMSO-*d*<sub>6</sub>): δ= 9.89 (s, 1 H), 7.99 (s, 1  
22 H), 6.24 (s, 1H), 4.23 (t, J =5.6 Hz, 2 H), 3.50 (t, J =5.6 Hz, 2 H), 2.94 (s, 3 H), 1.97 (s, 3H). <sup>13</sup>H  
23 NMR (400 MHz, DMSO-*d*<sub>6</sub>): δ=180.02, 170.03, 158.98, 138.52, 124.79, 120.39, 119.52, 94.23,  
24 60.49, 53.13, 39.76, 20.40. MS(ESI):m/z Calcd. For C<sub>12</sub>H<sub>13</sub>NO<sub>3</sub>S<sub>2</sub> 283.0; found 284.0, [M+H]<sup>+</sup>.

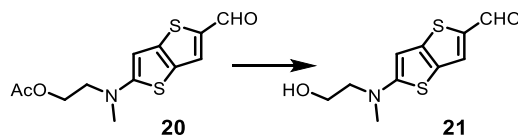

26 **Compound 21:** This compound was obtained by following the general procedure for  
27 compound 11. (0.374 g, yield 98%). <sup>1</sup>H NMR (400 MHz, DMSO-*d*<sub>6</sub>): δ= 9.66 (s, 1 H), 8.05 (s, 1

1 H), 6.30 (s, 1 H), 4.88 (bt, 1 H), 3.64 (t, J =5.6 Hz, 2 H), 3.44 (t, J =5.6 Hz, 2 H), 3.07 (s, 3 H). <sup>13</sup>H  
2 NMR (100 MHz, DMSO-*d*<sub>6</sub>): δ=181.01, 165.59, 149.11, 135.79, 131.60, 124.55, 92.80, 57.67,  
3 56.67, 40.12. MS(ESI): m/z Calcd. For C<sub>10</sub>H<sub>11</sub>NO<sub>2</sub>S<sub>2</sub> 241.0; found 242.0, [M+H]<sup>+</sup>.

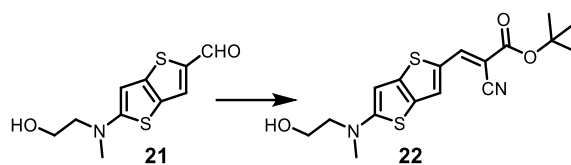

6 **Compound 22:** This compound was obtained by following the general procedure for  
7 compound 7. (0.351 g, yield 93%). <sup>1</sup>H NMR (400 MHz, DMSO-*d*<sub>6</sub>): δ= 8.22 (s, 1 H), 8.02 (s, 1 H),  
8 6.43 (s, 1 H), 4.91 (t, J =5.6 Hz, 1 H), 3.65(t, J =5.6 Hz, 2 H), 3.48 (t, J =5.2 Hz, 2 H), 3.12 (s, 3H),  
9 1.49 (s, 9 H). <sup>13</sup>H NMR (100 MHz, DMSO-*d*<sub>6</sub>): δ =167.40, 162.82, 152.58, 145.78, 128.65, 125.67,  
10 117.75, 93.91, 88.83, 81.38, 57.88, 57.08, 40.52, 27.70, 18.48. MS(ESI): m/z Calcd. For  
C<sub>17</sub>H<sub>20</sub>N<sub>2</sub>O<sub>3</sub>S<sub>2</sub> 364.1; found 365.1, [M+H]<sup>+</sup>.

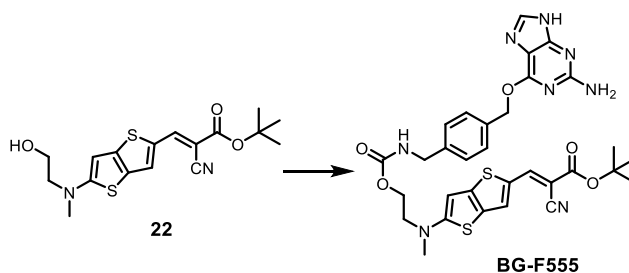

13 **Compound BG-F555:** This compound was obtained by following the general procedure  
14 for BG-F485. (0.335 g, yield 81%). <sup>1</sup>H NMR (400 MHz, DMSO-*d*<sub>6</sub>): δ=12.46 (br, 1 H), 8.26 (s, 1  
15 H), 8.04 (s, 1 H), 7.82 (s, 1 H), 7.77 (t, 1 H, J=6.0 Hz), 7.40 (d, 2 H, J=8.0 Hz), 7.21 (d, 2 H, J=8.0  
16 Hz), 6.46 (s, 1 H), 6.28 (br, 2 H), 5.43 (s, 2 H), 4.24 (t, 2 H, J=4.8 Hz), 4.16 (d, 2 H, J=6.0 Hz), 3.65  
17 (t, 2 H, J=4.8 Hz), 3.09 (s, 3 H), 1.51 (s, 9 H). <sup>13</sup>H NMR (100 MHz, DMSO-*d*<sub>6</sub>): δ =167.01, 162.74,  
18 159.56, 156.06, 152.28, 145.98, 139.43, 135.16, 133.73, 133.67, 129.02, 128.41, 126.94,  
19 125.90, 117.69, 94.23, 89.41, 81.48, 66.45, 60.68, 55.96, 53.83, 45.49, 43.51, 40.23, 27.69,  
18.49, 8.58. HR-MS(ESI):m/z Calcd. For C<sub>31</sub>H<sub>32</sub>N<sub>8</sub>O<sub>5</sub>S<sub>2</sub> 660.1937; found 683.1940, [M+Na]<sup>+</sup>.

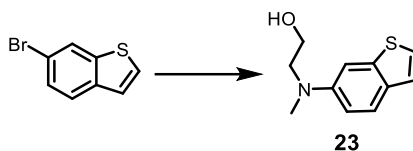

22 **Compound 23:** 6-bromobenzothiophene (0.426 g, 2.0 mmol), CuI (76 mg, 0.4 mmol),  
23 K<sub>3</sub>PO<sub>4</sub> (0.829 g, 6.0 mmol), (L)-proline (92 mg, 0.80 mmol), and 10 mL 2-methylaminoethanol  
24 were stirred at 90 °C overnight under the protection of N<sub>2</sub>. After cooling to room temperature,  
50 mL water was added to the mixture. The organic compounds were extracted with CH<sub>2</sub>Cl<sub>2</sub>,

1 and dried over Na<sub>2</sub>SO<sub>4</sub>. The solution was filtered and the solvent removed under reduce  
2 pressure to give the crude product which was purified by silica gel column chromatography to  
3 afford compound 23. (0.323 g, yield 78%). <sup>1</sup>H NMR (400 MHz, DMSO-*d*<sub>6</sub>): δ= 7.63 (d, J =8.8 Hz,  
4 1 H), 7.28 (d, J =5.6 Hz, 1 H), 7.21 (d, J =5.4 Hz, 1 H), 7.17 (d, J =1.6 Hz, 1 H), 6.89 (dd, J =8.8,  
5 2.4 Hz, 1 H), 4.69 (bt, 1H), 3.57 (t, J =6.0Hz, 2H), 3.44(t, J =6.4 Hz, 2H), 2.97 (s, 3H). <sup>13</sup>H NMR  
6 (100 MHz, DMSO-*d*<sub>6</sub>): δ=147.05, 141.41, 129.71, 123.58, 123.34, 121.37, 111.65, 103.40, 58.10,  
7 54.72,38.97. MS(ESI): m/z Calcd. For C<sub>11</sub>H<sub>13</sub>NOS 207.1; found 207.1, [M+H]<sup>+</sup>.

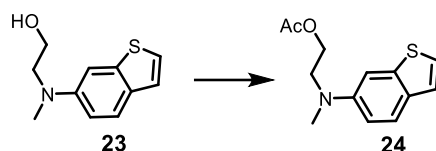

9 **Compound 24:** This compound was obtained by following the general procedure for  
10 compound 9. (0.355 g, yield 99%). <sup>1</sup>H NMR (400 MHz, DMSO-*d*<sub>6</sub>): δ = 7.65 (d, J =8.8 Hz, 1 H),  
11 7.31 (d, J =5.6 Hz, 1 H), 7.22 (d, J =5.2 Hz, 2 H), 6.93 (dd, J =8.8, 2.4 Hz, 1H), 4.19 (t, J =5.8 Hz,  
12 2 H), 3.64 (t, J =5.6 Hz, 2H), 2.97 (s, 3H), 1.94 (s, 3H). <sup>13</sup>H NMR (100 MHz, DMSO-*d*<sub>6</sub>): δ=170.33,  
13 146.61, 141.40, 130.12, 123.66, 123.33, 121.79, 111.76, 103.82, 61.10, 50.68, 38.69, 20.61.  
14 MS(ESI): m/z Calcd. For C<sub>13</sub>H<sub>15</sub>NO<sub>2</sub>S 249.1; found 250.1, [M+H]<sup>+</sup>.

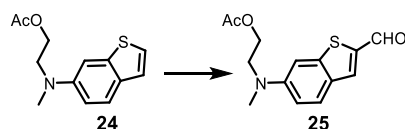

16 **Compound 25:** This compound was obtained by following the general procedure for  
17 compound 10. (0.322 g, yield 75%). <sup>1</sup>H NMR (400 MHz, DMSO-*d*<sub>6</sub>): δ= 9.93 (1H, s), 8.15 (1H, s),  
18 7.83 (1H, d, J =9.1Hz), 7.23 (1H, d, J =2.2Hz), 7.03 (1H, dd, J =9.1, 2.4Hz), 4.21 (2H, t, J =5.7Hz),  
19 3.72 (2H, t, J =5.7Hz), 3.03 (3H, s), 1.93 (3H, s). <sup>13</sup>H NMR (100 MHz, DMSO-*d*<sub>6</sub>): δ=184.48,  
20 170.30, 149.52, 145.11, 137.43, 136.65, 128.71, 127.17, 112.78, 102.94, 61.08, 50.22, 38.69,  
21 20.57. MS(ESI): m/z Calcd. For C<sub>14</sub>H<sub>15</sub>NO<sub>3</sub>S 277.1; found 278.1, [M+H]<sup>+</sup>.

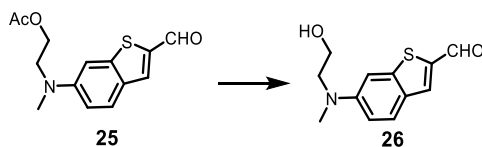

23 **Compound 26:** This compound was obtained by following the general procedure for  
24 compound 11. (0.235 g, yield 95%). <sup>1</sup>H NMR (400 MHz, DMSO-*d*<sub>6</sub>): δ =9.91 (s, 1 H), 8.14(s, 1 H),  
25 7.81 (d, J =5.2 Hz, 1 H), 7.17 (d, J =2.0 Hz, 1 H), 7.01 (dd, J =2.0, 8.8 Hz, 1 H), 4.76 (t, J =5.6 Hz, 1  
26 H), 3.58 (t, J =4.2 Hz, 2 H), 3.52 (t, J =4.2 Hz, 2 H), 3.04 (s, 3 H). <sup>13</sup>H NMR (100 MHz, DMSO-*d*<sub>6</sub>):  
27 δ=183.89, 149.47, 144.75, 136.52, 136.31, 127.85, 126.68, 112.34, 102.08, 57.73, 53.71, 38.99.

1 MS(ESI):m/z Calcd. For  $C_{12}H_{13}NO_2S$  235.1; found 236.1,  $[M+H]^+$ .

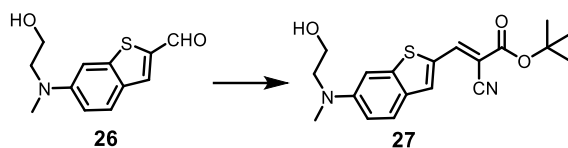

4 **Compound 27:** This compound was obtained by following the general procedure for  
5 compound 7. (0.255 g, yield 89%).  $^1H$  NMR (400 MHz,  $DMSO-d_6$ ):  $\delta$  = 8.41 (s, 1 H), 8.10 (s, 1 H),  
6 7.76 (d,  $J$  = 9.2 Hz, 1 H), 7.24 (d,  $J$  = 2.0 Hz, 1H), 7.01 (dd,  $J$  = 9.2, 2.4 Hz, 1 H), 4.75 (bt, 1H), 3.61  
7 (t,  $J$  = 5.2 Hz, 2 H), 3.55 (t,  $J$  = 5.2 Hz, 2 H), 3.07 (s, 3 H), 1.52 (s, 9 H).  $^{13}C$  NMR (100 MHz,  $DMSO-$   
8  $d_6$ ):  $\delta$  = 161.79, 150.12, 147.28, 146.52, 139.12, 129.50, 127.70, 126.65, 116.57, 113.20, 102.19,  
9 95.97, 82.35, 58.25, 54.20, 27.63. MS(ESI): m/z Calcd. For  $C_{19}H_{22}N_2O_3S$  358.1; found 358.1,  
10  $[M+H]^+$ .

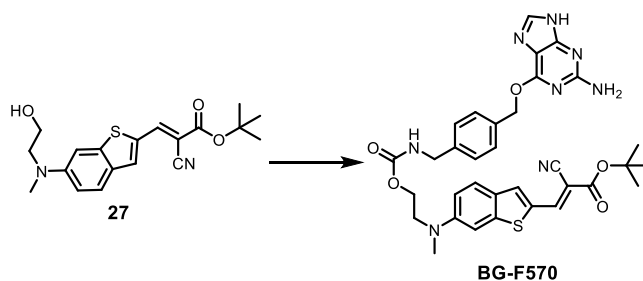

19 **Compound BG-F570:** This compound was obtained by following the general procedure  
20 for BG-F485. (0.315 g, yield 86%).  $^1H$  NMR (400 MHz,  $DMSO-d_6$ ):  $\delta$  = 12.50 (br, 1 H), 8.43 (s, 1  
21 H), 8.12 (s, 1 H), 7.85 (s, 1 H), 7.71 (m, 1 H), 7.32 (d, 2 H,  $J$  = 8.0 Hz), 7.30 (s, 1 H), 7.22 (d, 2 H,  
22  $J$  = 8.0 Hz), 7.02 (dd,  $J$  = 2.0, 9.2 Hz, 1 H), 6.30 (br, 2 H), 5.44 (s, 2 H), 4.17 (m, 4 H), 3.71 (t, 2 H,  
23  $J$  = 5.6 Hz), 3.06 (s, 3 H), 1.51 (s, 9 H).  $^{13}C$  NMR (100 MHz,  $DMSO-d_6$ ):  $\delta$  = 161.73, 159.56, 156.29,  
24 149.81, 147.38, 146.43, 139.52, 139.12, 135.17, 129.83, 128.45, 128.01, 127.00, 126.76,  
116.53, 113.12, 102.47, 96.32, 82.42, 66.53, 61.12, 50.80, 45.51, 43.52, 30.93, 27.62, 22.04,  
13.94, 8.50. HR-MS(ESI): m/z Calcd. For  $C_{33}H_{34}N_8O_5S$  654.2373; found 677.2370,  $[M+Na]^+$ .

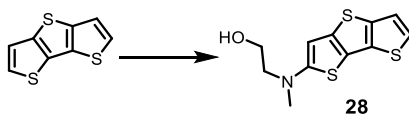

25 **Compound 28:** This compound was obtained by following the general procedure for  
26 compound 18. (0.530 g, yield 81%).  $^1H$  NMR (400 MHz,  $CDCl_3$ ):  $\delta$  = 7.11 (q,  $J$  = 5.2 Hz, 2 H), 6.16  
27 (s, 1 H), 4.77 (bt,  $J$  = 5.2 Hz, 1 H), 3.61 (q,  $J$  = 5.6 Hz, 2 H), 3.31 (t,  $J$  = 6.0 Hz, 2 H), 2.95 (s, 3H).  
28  $^{13}C$  NMR (100 MHz,  $CDCl_3$ ):  $\delta$  = 156.71, 155.31, 138.91, 124.52, 120.09, 119.72, 110.51, 93.28,  
57.91, 57.11, 40.25. MS(ESI):m/z Calcd. For  $C_{11}H_{11}NO_2S_3$  269.0; found 270.0,  $[M+H]^+$ .



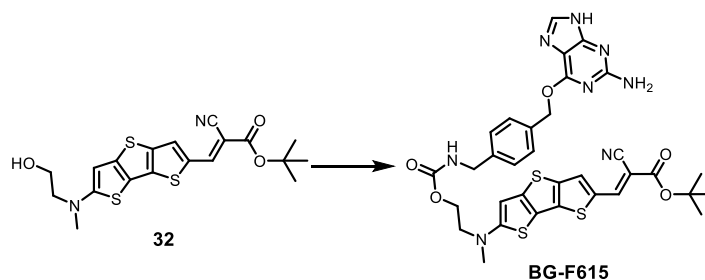

1

2

3

4

5

6

7

8

9

**Compound BG-F615:** This compound was obtained by following the general procedure for BG-F485. (0.265 g, yield 86%). <sup>1</sup>H NMR (400 MHz, DMSO-*d*<sub>6</sub>): δ = 8.53(t, J=5.8 Hz, 1 H), 8.36 (s, 1 H), 8.21 (s, 1H), 7.79 (s, 1 H), 7.44 (d, J=7.8 Hz, 2 H), 7.30 (d, J=7.8 Hz, 2 H), 6.40 (s, 1 H), 6.27 (s, 2 H), 5.44 (s, 2 H), 4.90 (t, J=5.6 Hz, 1 H), 4.37 (d, J=5.8 Hz, 2 H), 3.65(q, J=5.6 Hz, 3 H), 4.90 (t, J=5.6 Hz, 3 H), 1.50(s, 9 H). <sup>13</sup>H NMR (100 MHz, DMSO-*d*<sub>6</sub>): δ =165.31, 162.69, 159.62, 155.20, 151.18, 147.07, 141.74, 139.28, 137.76, 136.16, 135.30, 134.49, 131.92, 128.44, 127.40, 117.68, 114.99, 95.05, 92.76, 82.55, 58.42, 57.49, 28.18, 20.41. HR-MS(ESI): m/z Calcd. For C<sub>33</sub>H<sub>32</sub>N<sub>8</sub>O<sub>5</sub>S<sub>3</sub> 716.1568; found 739.1570, [M+Na]<sup>+</sup>.

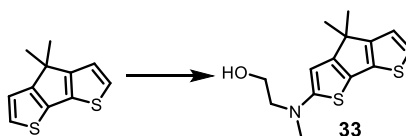

10

11

12

13

14

15

16

**Compound 33:** This compound was obtained by following the general procedure for compound 18. (0.525 g, yield 76%). <sup>1</sup>H NMR (400 MHz, DMSO-*d*<sub>6</sub>): δ = 7.15 (s, 1 H), 6.76(q, J =5.2 Hz, 2 H), 4.77 (t, J =5.2 Hz, 1 H), 3.61 (q, J =5.6 Hz, 2 H), 3.31 (t, J =6.0 Hz, 2 H), 2.95 (s, 3H) ,1.49(s, 6 H). <sup>13</sup>H NMR (100 MHz, DMSO-*d*<sub>6</sub>): δ=158.61, 155.22, 136.81, 125.04, 124.53,111.09, 110.49, 58.92, 58.31, 55.23, 40.29, 30.11, 29.62, 10.21. MS(ESI): m/z Calcd. For C<sub>14</sub>H<sub>17</sub>NOS<sub>2</sub> 279.1; found 280.1, [M+H]<sup>+</sup>.

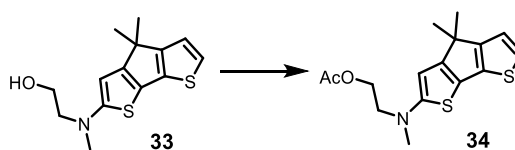

17

18

19

20

21

22

23

**Compound 34:** This compound was obtained by following the general procedure for compound 9. (0.415 g, yield 98%). <sup>1</sup>H NMR (400 MHz, DMSO-*d*<sub>6</sub>): δ = 7.15 (s, 1 H), 6.76 (q, J =5.2 Hz, 2 H), 4.77 (t, J =5.2 Hz, 1 H), 3.61 (q, J =5.6 Hz, 2 H), 3.31 (t, J =6.0 Hz, 2 H), 2.95 (s, 3 H), 1.97 (s, 3 H), 1.49 (s, 6 H). <sup>13</sup>H NMR (100 MHz, DMSO-*d*<sub>6</sub>): δ = 170.21, 158.61, 155.22, 136.81, 125.04, 124.53,111.09, 110.49, 58.92, 58.31, 55.23, 40.29, 30.11, 29.62, 20.41,10.21. MS(ESI): m/z Calcd. For C<sub>16</sub>H<sub>19</sub>NO<sub>2</sub>S<sub>2</sub> 321.1; found 322.1, [M+H]<sup>+</sup>.

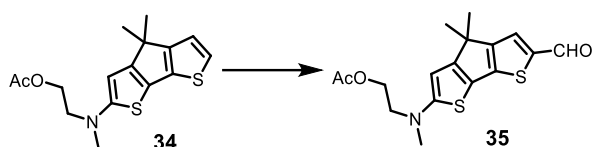

1

2

3

4

5

6

7

**Compound 35:** This compound was obtained by following the general procedure for compound 10. (0.481 g, yield 75%).  $^1\text{H}$  NMR (400 MHz,  $\text{DMSO-}d_6$ ):  $\delta$ = 9.87 (s, 1 H), 7.15 (s, 1 H), 6.76 (q,  $J$  =5.2 Hz, 2 H), 4.77 (t,  $J$  =5.2 Hz, 1 H), 3.61 (q,  $J$  =5.6 Hz, 2 H), 3.31 (t,  $J$  =6.0 Hz, 2 H), 2.95 (s, 3 H), 19.7(s, 3 H), 1.49 (s, 6 H).  $^{13}\text{C}$  NMR (100 MHz,  $\text{DMSO-}d_6$ ):  $\delta$ = 183.06, 170.21, 158.61, 155.22, 136.81, 125.04, 124.53, 111.09, 110.49, 58.92, 58.31, 55.23, 40.29, 30.11, 29.62, 20.41, 10.21. MS(ESI):  $m/z$  Calcd. For  $\text{C}_{17}\text{H}_{19}\text{NO}_3\text{S}_2$  349.1; found 372.1,  $[\text{M}+\text{Na}]^+$ .

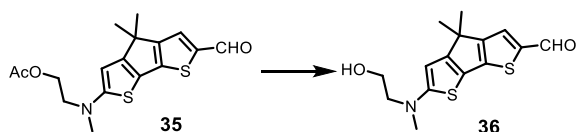

8

9

10

11

12

13

14

**Compound 36:** This compound was obtained by following the general procedure for compound 11. (0.320 g, yield 95%).  $^1\text{H}$  NMR (400 MHz,  $\text{DMSO-}d_6$ ):  $\delta$ = 9.87 (s, 1 H), 7.15 (s, 1 H), 6.76 (q,  $J$  =5.2 Hz, 2 H), 4.77 (t,  $J$  =5.2 Hz, 1 H), 3.61 (q,  $J$  =5.6 Hz, 2 H), 3.31 (t,  $J$  =6.0 Hz, 2 H), 2.95 (s, 3 H), 1.97(s, 3 H), 1.49(s, 6 H).  $^{13}\text{C}$  NMR (100 MHz,  $\text{DMSO-}d_6$ ):  $\delta$ = 182.58, 163.22, 159.58, 145.64, 143.75, 134.73, 129.41, 124.34, 116.46, 77.22, 58.92, 58.31, 55.23, 45.97, 40.29, 24.81. MS(ESI):  $m/z$  Calcd. For  $\text{C}_{15}\text{H}_{17}\text{NO}_2\text{S}_2$  307.1; found 308.1,  $[\text{M}+\text{H}]^+$ .

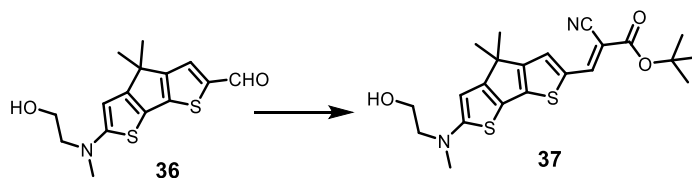

15

16

17

18

19

20

21

**Compound 37:** This compound was obtained by following the general procedure for compound 7. (0.256 g, yield 91%).  $^1\text{H}$  NMR (400 MHz,  $\text{DMSO-}d_6$ ):  $\delta$ = 8.12 (s, 1 H), 7.75 (s, 1 H), 6.22 (s, 1 H), 4.89 (t,  $J$  =5.6 Hz, 1 H), 3.65 (t,  $J$  =5.6 Hz, 2 H), 3.48 (t,  $J$  =5.6 Hz, 2 H), 3.09 (s, 3 H), 1.49 (s, 9H), 1.39 (s, 6 H).  $^{13}\text{C}$  NMR (100 MHz,  $\text{DMSO-}d_6$ ):  $\delta$ =170.62, 167.36, 163.21, 153.00, 152.14, 145.20, 130.80, 118.47, 115.36, 96.26, 86.40, 80.97, 57.79, 57.06, 44.48, 40.63, 27.76, 24.81. MS(ESI):  $m/z$  Calcd. For  $\text{C}_{22}\text{H}_{26}\text{N}_2\text{O}_3\text{S}_2$  430.1; found 431.1,  $[\text{M}+\text{H}]^+$ .

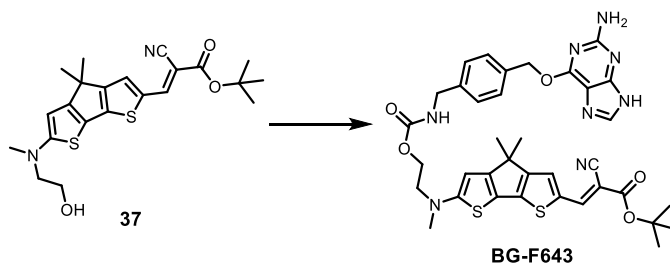

22

23

**Compound BG-F643:** This compound was obtained by following the general procedure

1 for BG-F485. (0.225 g, yield 85%). <sup>1</sup>H NMR (400 MHz, DMSO-*d*<sub>6</sub>): δ=12.03 (s, 1 H), 8.55(t, J=5.8  
 2 Hz, 1 H), 8.12 (s, 1 H), 7.79 (s, 1 H), 7.75 (s, 1 H), 7.44 (d, J=7.9 Hz, 2 H), 7.30 (d, J=7.9 Hz, 2 H),  
 3 6.27(s, 2 H), 6.22 (s, 1 H), 5.44(s, 2 H), 4.89 (t, J =5.6 Hz, 1 H), 4.37 (d, J=5.8 Hz, 2 H), 3.65(t, J  
 4 =5.6 Hz, 2 H), 3.48 (t, J =5.6 Hz, 2 H), 3.09 (s, 3 H), 1.49 (s, 9H), 1.39 (s, 6 H). <sup>13</sup>H NMR (100 MHz,  
 5 DMSO-*d*<sub>6</sub>): δ=170.62, 167.36, 163.21, 159.62, 155.18, 153.00, 152.14, 145.20, 139.28, 137.76,  
 6 135.30, 130.80, 128.44, 127.41, 118.47, 115.36, 113.51, 96.26, 86.40, 80.97, 57.79, 57.06,  
 7 44.48, 40.63, 27.76, 24.81. HR-MS(ESI): m/z Calcd. For C<sub>36</sub>H<sub>38</sub>N<sub>8</sub>O<sub>5</sub>S<sub>2</sub> 726.2407; found 759.2405,  
 8 [M+Na]<sup>+</sup>.

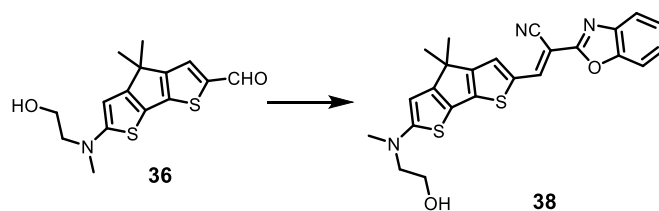

10 **Compound 38:** To a stirred solution of compound 36 (0.20 g, 0.65 mmol) and 2-(1,3-  
 11 benzoxazol-2-yl)acetonitrile (0.124 g, 0.78 mmol) in 10 mL anhydrous methanol, a catalytic  
 12 amount (2 drops) of piperidine was added. The obtained mixture was stirred and kept at 80 °C  
 13 for 15 min. After cooling to room temperature, the solvent was removed under reduce  
 14 pressure to give the crude product which was purified by silica gel column chromatography to  
 15 afford the black compound 38. (0.293 g, yield 97%). <sup>1</sup>H NMR (400 MHz, DMSO-*d*<sub>6</sub>): δ= 8.37 (s,  
 16 1 H), 7.81 (s, 1 H), 7.64-7.71 (m, 2 H), 7.30-7.38 (m, 2 H), 6.24 (s, 1 H), 4.90 (t, J =5.2 Hz, 1 H),  
 17 3.66 (t, J =6.0 Hz, 2 H), 3.47 (t, J =6.0 Hz, 2 H), 3.10 (s, 3H), 1.42 (s, 6 H). <sup>13</sup>H NMR (100 MHz,  
 18 DMSO-*d*<sub>6</sub>): δ=170.58, 167.38, 161.21, 152.36, 149.90, 141.86, 140.75, 131.87, 124.74, 124.41,  
 19 118.65, 117.69, 115.56, 110.17, 96.37, 57.81, 57.09, 44.52, 40.66, 24.87. MS(ESI): m/z Calcd.  
 20 For C<sub>24</sub>H<sub>22</sub>N<sub>3</sub>O<sub>2</sub>S<sub>2</sub> 447.1; found 448.1, [M+H]<sup>+</sup>.

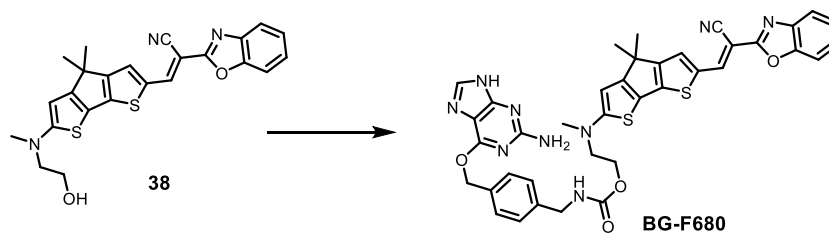

22 **Compound BG-F680:** This compound was obtained by following the general procedure  
 23 for BG-F485. (0.182 g, yield 80%). <sup>1</sup>H NMR (400 MHz, DMSO-*d*<sub>6</sub>): δ= 8.55(t, J=5.8 Hz, 1 H), 8.37  
 24 (s, 1 H), 7.79(s, 1 H), 7.81 (s, 1 H), 7.64-7.71 (m, 2 H), 7.44 (d, J=7.9 Hz, 2 H), 7.30-7.38 (m, 4 H),  
 25 6.27(s, 2 H), 6.24 (s, 1 H), 5.44 (s, 2 H), 4.90 (t, J =5.2 Hz, 1 H), 4,37 (d, J=5.8 Hz, 2 H), 3.66 (t, J  
 26 =6.0 Hz, 2 H), 3.47 (t, J =6.0 Hz, 2 H), 3.10 (s, 3H), 1.42 (s, 6 H). <sup>13</sup>H NMR (100 MHz, DMSO-*d*<sub>6</sub>):  
 27 δ=170.58, 167.38, 161.21, 159.62, 155.31, 152.36, 149.90, 141.86, 140.75, 139.38, 137.55,



1 135.30, 131.87, 128.44, 127.21, 124.74, 124.41, 118.65, 117.69, 115.56, 110.17, 96.37, 665.50,  
2 57.81, 57.09, 44.52, 42.85, 40.66, 24.87. HR-MS(ESI): m/z Calcd. For C<sub>38</sub>H<sub>33</sub>N<sub>9</sub>O<sub>4</sub>S 743.2097;  
3 found 766.2096, [M+Na]<sup>+</sup>.

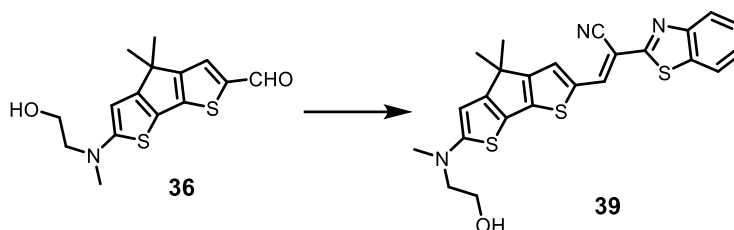

5 **Compound 39:** To a stirred solution of compound (0.25 g, 0.81 mmol) and 2-(1,3-  
6 benzothiazole-2-yl)acetonitrile (0.17 g, 0.98 mmol) in 10 mL anhydrous methanol, a catalytic  
7 amount (2 drops) of piperidine was added. The obtained mixture was stirred at 80 °C for 15  
8 min under the protection of N<sub>2</sub>. After cooling to room temperature, the solvent was removed  
9 under reduce pressure to give the crude production which was purified by silica gel column  
10 chromatography to afford the black compound 39. (0.336 g, yield 89%). <sup>1</sup>H NMR (400 MHz,  
11 DMSO-*d*<sub>6</sub>): δ = 8.31 (s, 1H), 8.04 (d, J = 7.8 Hz, 1H), 7.89 (d, J = 8.1 Hz, 1H), 7.79 (s, 1H), 7.48 (t,  
12 J = 7.6 Hz, 1H), 7.37 (t, J = 7.5 Hz, 1H), 6.21 (s, 1H), 5.76 (s, 1H), 4.88 (d, J = 4.8 Hz, 2H), 3.65 (d,  
13 J = 4.7 Hz, 2H), 3.45 (s, 2H), 3.08 (s, 3H), 1.41 (s, 6H). <sup>13</sup>C NMR (100 MHz, DMSO-*d*<sub>6</sub>): δ = 170.50,  
14 167.43, 165.18, 154.01, 140.23, 134.15, 127.13, 125.12, 122.45, 122.16, 119.13, 96.80, 58.36,  
15 57.61, 55.39, 45.09, 41.17, 25.40. MS(ESI): m/z Calcd. For C<sub>24</sub>H<sub>21</sub>N<sub>3</sub>OS<sub>3</sub> 463.1; found: 464.1,  
16 [M+H]<sup>+</sup>.

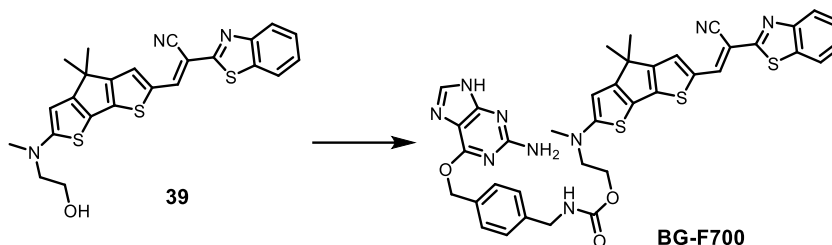

18 **Compound BG-F700:** This compound was obtained by following the general procedure for  
19 BG-F485. (0.182 g, yield 80%). <sup>1</sup>H NMR (400 MHz, DMSO-*d*<sub>6</sub>): δ = 12.51 (s, 1 H), 8.55 (t, J=5.8  
20 Hz, 1 H), 8.31 (s, 1H), 8.04 (d, J = 7.8 Hz, 1H), 7.79 (s, 1 H), 7.89 (d, J = 8.1 Hz, 1H), 7.79 (s,  
21 1H), 7.48 (t, J = 7.6 Hz, 1H), 7.44 (d, J=7.9 Hz, 2 H), 7.37 (t, J = 7.5 Hz, 1H), 7.30 (d, J=7.9 Hz, 2  
22 H), 6.27 (s, 2 H), 6.21 (s, 1H), 5.76 (s, 1H), 5.44 (s, 2 H), 4.88 (d, J = 4.8 Hz, 2H), 4.37 (d, J=5.8  
23 Hz, 2 H), 3.65 (d, J = 4.7 Hz, 2H), 3.45 (s, 2H), 3.08 (s, 3H), 1.41 (s, 6H). <sup>13</sup>C NMR (100 MHz,  
24 DMSO-*d*<sub>6</sub>): δ = 170.50, 167.43, 165.18, 159.63, 155.46, 154.01, 140.23, 139.11, 137.68,  
25 135.21, 134.15, 128.85, 127.95, 127.13, 125.12, 122.45, 122.16, 119.13, 96.80, 66.59, 58.36,  
26 57.61, 55.39, 45.09, 42.87, 42.98, 41.17, 25.40. HR-MS(ESI): m/z Calcd. For C<sub>38</sub>H<sub>33</sub>N<sub>9</sub>O<sub>3</sub>S<sub>3</sub>

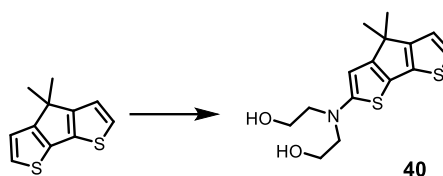

1 759.1868; found 782.1870,  $[M+Na]^+$ .

2 **Compound 40:** This compound was obtained by following the general procedure for  
 3 compound 18. (0.319 g, yield 39%).  $^1H$  NMR (400 MHz, DMSO- $d_6$ ):  $\delta$ = 7.16 (s, 1 H), 6.76(q, J  
 4 =5.2 Hz, 2 H), 4.79 (t, J =4.8 Hz, 1 H), 3.84 (t, J =4.8 Hz, 4 H), 3.48 (t, J =4.8 Hz, 4 H), 1.46(s, 6  
 5 H).  $^{13}C$  NMR (100 MHz, DMSO- $d_6$ ):  $\delta$ =158.61, 155.22, 136.81, 125.04, 124.53,111.09, 110.49,  
 6 60.40, 52.11, 50.80, 31.70. MS(ESI): m/z Calcd. For  $C_{15}H_{19}NO_2S_2$  309.1; found 310.1,  $[M+H]^+$ .

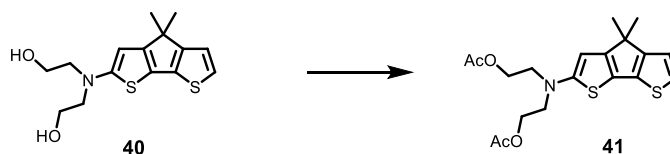

7  
 8 **Compound 41:** This compound was obtained by following the general procedure for  
 9 compound 9. (0.325 g, yield 95%).  $^1H$  NMR (400 MHz, DMSO- $d_6$ ):  $\delta$ = 7.16 (s, 1 H), 6.77(q, J=5.2  
 10 Hz, 2 H), 4.79 (t, J =4.8 Hz, 1 H), 3.85 (t, J =4.8 Hz, 4 H), 3.40 (t, J =4.8 Hz, 4 H), 2.05 (s, 6H),  
 11 1.46(s, 6 H).  $^{13}C$  NMR (100 MHz, DMSO- $d_6$ ):  $\delta$ =171.03, 158.61, 155.22, 136.81, 125.04, 124.53,  
 12 111.09, 110.49, 60.40, 52.11, 50.80, 31.67, 20.96. MS(ESI): m/z Calcd. For  $C_{19}H_{23}NO_4S_2$  393.1;  
 13 found 394.1,  $[M+H]^+$ .

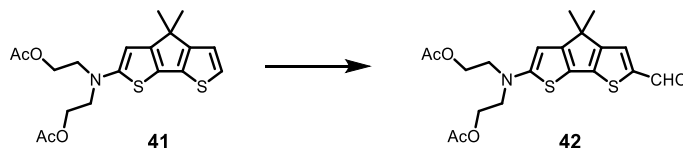

14  
 15 **Compound 42:** This compound was obtained by following the general procedure for  
 16 compound 9. (0.296 g, yield 65%).  $^1H$  NMR (400 MHz, DMSO- $d_6$ ):  $\delta$ = 9.66, 7.46 (s, 1 H), 6.76(q,  
 17 J=5.2 Hz, 2 H), 4.79 (t, J =5.2 Hz, 1 H), 3.85 (t, J =4.8 Hz, 4 H), 3.40 (t, J =4.8 Hz, 4 H), 2.05 (s, 6  
 18 H), 1.46(s, 6 H).  $^{13}C$  NMR (100 MHz, DMSO- $d_6$ ):  $\delta$ =158.61, 155.22, 136.81, 125.04,  
 19 124.53,111.09, 110.49, 60.40, 52.11, 50.80, 31.70, 20.90. MS(ESI): m/z Calcd. For  $C_{20}H_{123}NO_5S_2$   
 20 421.1; found 422.1,  $[M+H]^+$ .

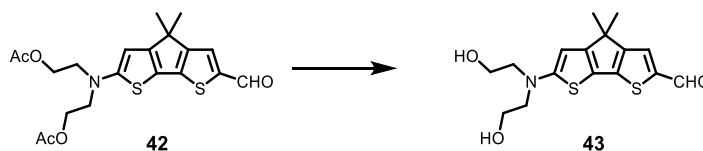

21  
 22 **Compound 43:** This compound was obtained by following the general procedure for  
 23 compound 9. (0.296 g, yield 65%).  $^1H$  NMR (400 MHz, DMSO- $d_6$ ):  $\delta$ = 9.66 (s, 1 H), 7.16 (s, 1 H),  
 24 6.76(q, J =5.2 Hz, 2 H), 4.79 (t, J =5.2 Hz, 1 H), 3.84 (t, J =4.8 Hz, 4 H), 3.48 (t, J =4.8 Hz, 4 H),

1 1.46(s, 6 H).  $^{13}\text{H}$  NMR (100 MHz,  $\text{DMSO-}d_6$ ):  $\delta=170.11, 160.61, 157.22, 136.81, 125.04,$   
2  $124.53, 111.09, 110.49, 60.40, 52.11, 50.80, 31.70$ . MS(ESI):  $m/z$  Calcd. For  $\text{C}_{15}\text{H}_{19}\text{NO}_2\text{S}_2$  309.1;  
3 found 310.1,  $[\text{M}+\text{H}]^+$ .

4

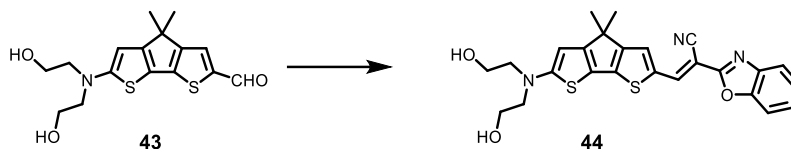

6

7 **Compound 44:** This compound was obtained by following the general procedure for  
8 compound 9. (0.271 g, yield 67%).  $^1\text{H}$  NMR (400 MHz,  $\text{DMSO-}d_6$ ):  $\delta= 8.37$  (s, 1H), 7.80 (s, 1H),  
9 7.70 – 7.64 (m, 2H), 7.37 – 7.30 (m, 2H), 6.27 (s, 1H), 3.67 (t,  $J = 5.6$  Hz, 4H), 3.52 (t,  $J = 5.6$  Hz,  
10 4H), 1.41 (s, 6H).  $^{13}\text{H}$  NMR (100 MHz,  $\text{DMSO-}d_6$ ):  $\delta=171.15, 166.96, 161.26, 159.63, 152.30,$   
11  $149.90, 141.94, 140.71, 131.92, 124.73, 124.38, 118.63, 115.24, 110.16, 96.33, 81.23, 69.71,$   
12  $57.71, 56.14, 44.52, 24.87$ . MS(ESI):  $m/z$  Calcd. For  $\text{C}_{25}\text{H}_{23}\text{N}_3\text{O}_3\text{S}_2$  477.1; found 461.2,  $[\text{M}+\text{H}]^+$ .

12

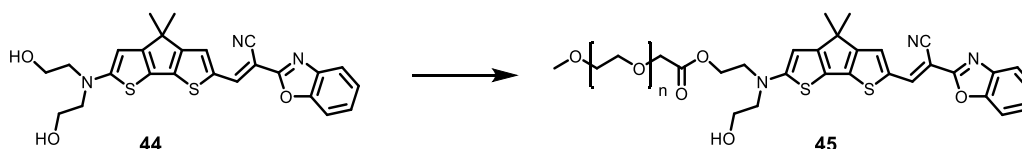

14

15 **Compound 45:** This compound was obtained by following the general procedure for  
16 compound 45. (0.62 g, yield 58%).  $^1\text{H}$  NMR (400 MHz,  $\text{DMSO-}d_6$ ):  $\delta= 8.37$  (s, 1H), 7.80 (s, 1H),  
17 7.68 (m, 2H), 7.35 (m, 2H), 6.27 (s, 1H), 4.03 (s, 2H), 3.58-5.44 (m, 190H), 3.25 (s, 3H), 1.41 (s,  
18 6H).  $^{13}\text{H}$  NMR (100 MHz,  $\text{DMSO-}d_6$ ):  $\delta=171.90, 171.15, 166.96, 161.26, 159.63, 152.30, 149.90,$   
19  $141.94, 140.71, 131.92, 124.73, 124.38, 118.63, 115.24, 110.16, 96.33, 81.23, 71.30, 69.91,$   
20  $69.71, 67.54, 58.10, 57.71, 56.14, 44.52, 24.87$ . MALDI-TOF spectrum exhibited the center of  
the peak at  $m/z$  2486.3,  $[\text{M}+\text{H}]^+$ .

20

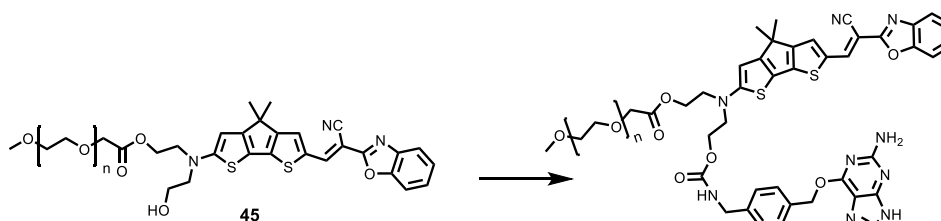

22

23 **Compound PEG-BG-680:** This compound was obtained by following the general  
24 procedure for BG-F485. (0.582 g, yield 51%).  $^1\text{H}$  NMR (400 MHz,  $\text{DMSO-}d_6$ ):  $\delta= 12.40$  (s, 1H),  
25  $8.37$  (s, 1H), 7.91 (s, 1H), 7.80 (s, 1H), 7.68 (m, 2H), 7.43 (d,  $J=7.9$ , 2H), 7.35 (m, 2H), 7.23 (d,  
 $J=7.9$ , 2H), 6.27 (m, 2H), 5.46 (s, 2H), 4.15 (d,  $J = 6.0$  Hz, 2H), 4.05 (s, 2H), 3.57-3.44 (m, 190H),

1 3.25 (s, 3H), 1.41 (s, 6H). <sup>13</sup>H NMR (100 MHz, DMSO-*d*<sub>6</sub>): δ=171.90, 171.15, 166.96, 161.26,  
2 159.63, 152.30, 149.90, 141.94, 140.71, 131.92, 124.73, 124.38, 118.63, 115.24, 110.16, 96.33,  
3 81.23, 71.30, 69.91, 69.71, 67.54, 58.10, 57.71, 56.14, 44.52, 24.87. MALDI-TOF spectrum  
4 exhibited the center of the peak at m/z 2782.4, [M+H]<sup>+</sup>.

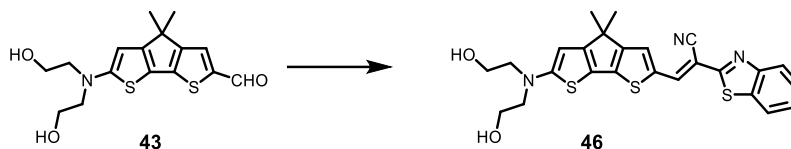

7 **Compound 46:** This compound was obtained by following the general procedure for  
8 compound 9. (0.296 g, yield 65%). <sup>1</sup>H NMR (400 MHz, DMSO-*d*<sub>6</sub>): δ= 8.32 (s, 1H), 8.05 (d, *J* =  
9 8.0 Hz, 1H), 7.90 (d, *J* = 8.0 Hz, 1H), 7.80 (s, 1H), 7.49 (t, *J* = 7.6 Hz, 1H), 7.37 (t, *J* = 7.6 Hz, 1H),  
10 6.25 (s, 1H), 3.66 (t, *J* = 5.6 Hz, 4H), 3.52 (t, *J* = 5.6 Hz, 4H), 1.41 (s, 7H). <sup>13</sup>H NMR (100 MHz,  
11 DMSO-*d*<sub>6</sub>): δ=169.99, 166.43, 164.68, 156.32, 153.49, 151.34, 139.70, 133.65, 131.92, 130.80,  
12 126.60, 124.59, 121.92, 121.62, 118.64, 115.26, 106.37, 96.27, 89.44, 57.71, 56.12, 44.55,  
13 40.34, 24.87. MS(ESI): m/z Calcd. For C<sub>25</sub>H<sub>23</sub>N<sub>3</sub>O<sub>2</sub>S<sub>3</sub> 493.1; found 494.1, [M+H]<sup>+</sup>.

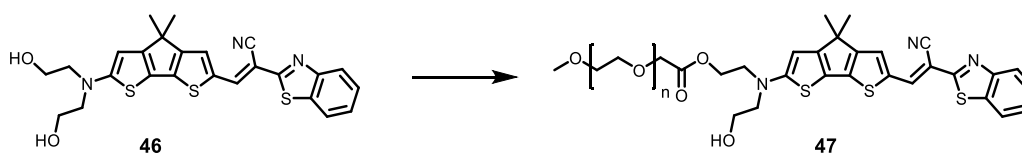

16 **Compound 47:** This compound was obtained by following the general procedure for  
17 compound 9. (0.296 g, yield 65%). <sup>1</sup>H NMR (400 MHz, DMSO-*d*<sub>6</sub>): δ= 8.32 (s, 1H), 8.05 (d, *J* =  
18 8.0 Hz, 1H), 7.90 (d, *J* = 8.0 Hz, 1H), 7.80 (s, 1H), 7.49 (t, *J* = 7.6 Hz, 1H), 7.37 (t, *J* = 7.6 Hz, 1H),  
19 6.25 (s, 1H), 4.05 (s, 2 H), 3.57-3.44 (m, 190H), 3.25 (s, 3H), 1.41 (s, 7H). <sup>13</sup>H NMR (100 MHz,  
20 DMSO-*d*<sub>6</sub>): δ=171.91, 169.99, 166.43, 164.68, 156.32, 153.49, 151.34, 139.70, 133.65, 131.92,  
21 130.80, 126.60, 124.59, 121.92, 121.62, 118.64, 115.26, 106.37, 96.27, 89.44, 71.20, 69.70,  
22 68.94, 67.48, 57.96, 57.71, 56.12, 44.55, 40.34, 24.87. MALDI-TOF spectrum exhibited the  
center of the peak at m/z 2502.3, [M+H]<sup>+</sup>.

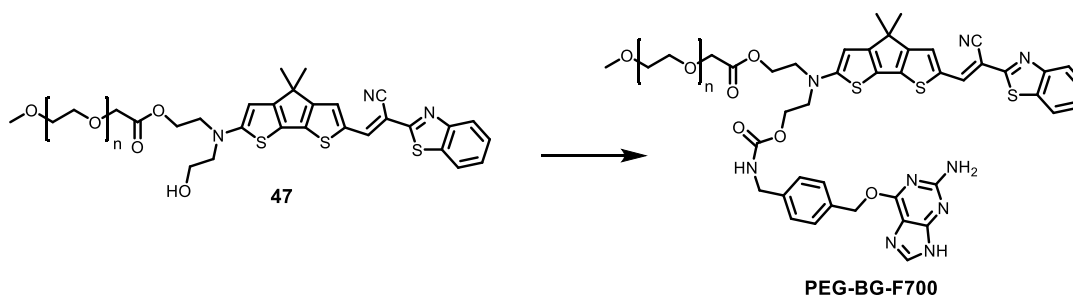

**Compound PEG-BG-700:** This compound was obtained by following the general

1 procedure for BG-F485. (0.610 g, yield 48%). 12.41 (s, 1 H), 8.32 (s, 1H), 8.05 (d,  $J = 8.0$  Hz, 1H),  
 2 7.90 (d,  $J = 8.0$  Hz, 1H), 7.80 (s, 1H), 7.49 (t,  $J = 7.6$  Hz, 1H), 7.43 (s, 1 H), 7.37 (t,  $J = 7.6$  Hz, 1H),  
 3 7.24 (d,  $J = 7.2$  Hz, 2 H), 6.32 (s, 2 H), 6.25 (s, 1H), 5.45 (s, 2 H), 4.15 (d,  $J = 6.0$  Hz, 2 H), 4.05 (s, 2  
 4 H), 3.57-3.44 (m, 190H), 3.25 (s, 3H), 1.41 (s, 7H).  $^{13}\text{C}$  NMR (100 MHz,  $\text{DMSO-}d_6$ ):  $\delta = 171.91$ ,  
 5 169.99, 166.43, 164.68, 159.92, 158, 62, 156.32, 155.81, 153.49, 151.34, 142.21, 139.70,  
 6 137.81, 135.21, 133.65, 131.92, 130.80, 128.50, 127.10, 126.60, 124.59, 121.92, 121.62,  
 7 118.64, 115.26, 113.50, 106.37, 96.27, 89.44, 77.80, 71.20, 69.70, 68.94, 67.48, 57.96, 57.71,  
 8 56.12, 44.55, 40.34, 28.61, 24.87. MALDI-TOF spectrum exhibited the center of the peak at  
 9  $m/z$  2798.4,  $[\text{M}+\text{H}]^+$ .

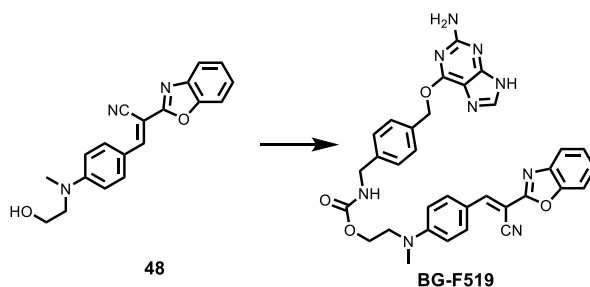

10  
 11 **Compound BG-F519:** This compound was obtained by following the general procedure  
 12 for BG-F485. (0.290 g, yield 88%).  $^1\text{H}$ -NMR (400 MHz,  $\text{DMSO-}d_6$ ):  $\delta = 12.41$  (s, 1H), 10.01 (s,  
 13 1H), 8.10 (m, 2H), 7.95 (m, 3H), 7.81 (s, 1 H), 7.70 (d, 1H,  $J = 8.8$  Hz), 7.45 (m, 1H), 7.41 (m, 4H),  
 14 6.29 (s, 2H), 6.27 (dd,  $J = 9.2, 1.6$  Hz, 1H), 6.02 (s, 1H), 5.46 (s, 2H), 4.40 (d,  $J = 4.9$  Hz, 2H), 3.88  
 15 (t,  $J = 5.6$  Hz, 2H), 3.64 (t,  $J = 5.6$  Hz, 2H), 3.15 (s, 3H). MS(ESI):  $m/z$  Calcd. For  $\text{C}_{33}\text{H}_{29}\text{N}_9\text{O}_4$   
 16 615.2343; found 638.2241,  $[\text{M}+\text{Na}]^+$

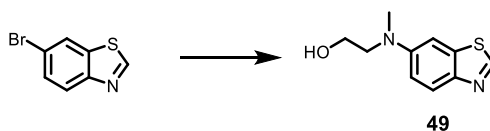

17  
 18 **Compound 49:** This compound was obtained by following the general procedure for  
 19 compound 18. (0.510 g, yield 69%).  $^1\text{H}$  NMR ( $\text{DMSO-}d_6$ , 400 MHz):  $\delta = 8.67$ (s, 1 H), 7.95(d,  
 20  $J = 8.8$  Hz, 1 H), 7.15(d,  $J = 2.4$  Hz, 1 H), 7.00 (dd,  $J = 8.8, 2.4$  Hz, 1 H), 4.69 (bt, 1H), 3.57 (t,  $J$   
 21  $= 6.0$ Hz, 2H), 3.44(t,  $J = 6.4$  Hz, 2H), 2.97 (s, 3H).  $^{13}\text{C}$  NMR ( $\text{DMSO-}d_6$ , 100 MHz):  $\delta = 147.05$ ,  
 22 141.41, 129.71, 123.58, 121.37, 111.65, 103.40, 58.10, 54.72, 38.97. MS(ESI):  $m/z$  calcd for  
 23  $\text{C}_{11}\text{H}_{13}\text{NOS}$  208.1; found 209.1,  $[\text{M}+\text{H}]^+$ .

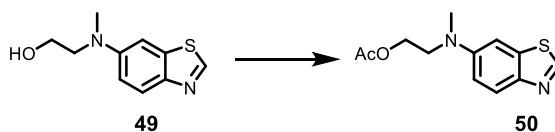

24  
 25 **Compound 50:** This compound was obtained by following the general procedure for

1 compound 9. (0.480 g, yield 97%). <sup>1</sup>H NMR (DMSO-d<sub>6</sub>, 400 MHz): δ= 8.67(s, 1 H), 7.95(d, J=8.8  
2 Hz, 1 H), 7.15(d, J=2.4 Hz, 1 H), 7.00(dd, J=8.8, 2.4 Hz, 1 H), 4.69 (bt, 1H), 3.97 (t, J =6.0Hz,  
3 2H), 3.44(t, J =6.4 Hz, 2H), 2.97 (s, 3H), 2.05 (s, 3H). <sup>13</sup>C NMR (DMSO-d<sub>6</sub>, 100 MHz): δ=171.08,  
4 147.05, 141.41, 129.71, 123.58, 121.37, 111.65, 103.40, 58.10, 51.72, 38.97, 20.96.  
5 MS(ESI):m/z calcd for C<sub>12</sub>H<sub>14</sub>N<sub>2</sub>O<sub>2</sub>S 208.1; found 251.1, [M+H]<sup>+</sup>.

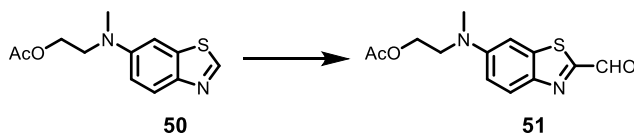

8 **Compound 51:** This compound was obtained by following the general procedure for  
9 compound 10. (0.362 g, yield 71%). <sup>1</sup>H NMR (DMSO-d<sub>6</sub>, 400 MHz): δ=10.05(s, 1 H),8.02(d, J=9.8  
10 Hz, 1 H), 7.05(dd, J=9.9 2.4 Hz, 1 H), 7.00(d, J= 2.4 Hz, 1 H), 4.69 (bt, 1H), 3.57 (t, J =6.0Hz,  
11 2H), 3.44(t, J =6.4 Hz, 2H), 3.01 (s, 3H), 2.05 (s, 3 H). <sup>13</sup>C NMR (DMSO-d<sub>6</sub>, 100 MHz): δ=185.21,  
12 171.10, 160.21, 150.86, 145.65, 140.12, 126.26, 114.90, 58.10, 54.72,38.97, 28.12.  
MS(ESI):m/z calcd for C<sub>13</sub>H<sub>14</sub>N<sub>2</sub>O<sub>3</sub>S 278.1 ; found 279.1, [M+H]<sup>+</sup>.

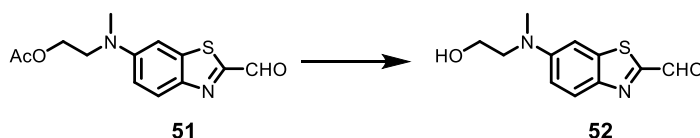

15 **Compound 52:** This compound was obtained by following the general procedure for  
16 compound 11. (0.273 g, yield 91%). <sup>1</sup>H NMR (DMSO-d<sub>6</sub>, 400 MHz): δ=10.05(s, 1 H),8.02(d, J=9.8  
17 Hz, 1 H), 7.05(dd, J=9.9 2.4 Hz, 1 H), 7.00(d, J= 2.4 Hz, 1 H), 4.69 (bt, 1H), 3.57 (t, J =6.0Hz,  
18 2H), 3.44(t, J =6.4 Hz, 2H), 3.01 (s, 3H). <sup>13</sup>C NMR (DMSO-d<sub>6</sub>, 100 MHz): δ=185.21, 160.21,  
19 150.86, 145.65, 140.12, 126.26, 114.90, 58.10, 54.72, 38.97. MS (ESI):m/z calcd 236.1 ; found  
20 237.1, [M+H]<sup>+</sup>.

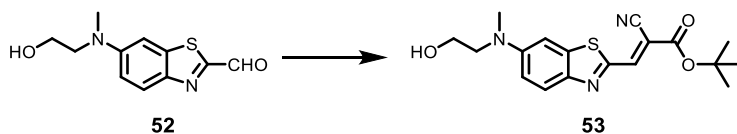

23 **Compound 53:** This compound was obtained by following the general procedure for  
24 compound 7. (0.215 g, yield 79%). <sup>1</sup>H NMR (DMSO-d<sub>6</sub>, 400 MHz): δ=8.00(s, 1 H), 7.65(d, J=9.2  
25 Hz, 1 H), 7.08(d, J= 9.2 Hz, 1 H),7.02(d, J=2.4 Hz, 1 H), 4.69 (bt, 1H), 3.57 (t, J =6.0Hz, 2H),  
26 3.44(t, J =6.4 Hz, 2H), 3.01 (s, 3H). <sup>13</sup>C NMR (DMSO-d<sub>6</sub>, 100 MHz): δ=169.84,151.32,151.22,  
27 150.86, 145.54, 141.12, 126.26, 114.90,113.99, 111.99, 100.67, 81.65, 58.10, 54.72,38.97.  
MS(ESI):m/z calcd 359.1 ; found 360.1, [M+H]<sup>+</sup>.

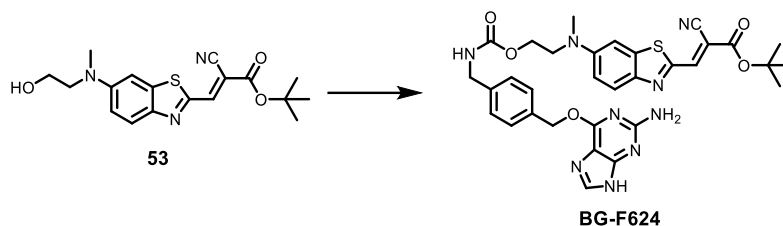

1

2

3

4

5

6

7

8

9

**Compound BG-F624:** This compound was obtained by following the general procedure for BG-F485. (0.115 g, yield 76%). <sup>1</sup>H NMR (DMSO-d<sub>6</sub>, 400 MHz): δ =12.51 (br, 1 H), 8.40 (s, 1 H), 8.02 (s, 1 H), 7.71 (m, 1 H), 7.32 (d, 2 H, J=8.0 Hz), 7.30 (s, 1 H), 7.22 (d, 2 H, J=8.0 Hz), 7.02 (dd, J=2.0, 9.2 Hz, 1 H), 6.30 (br, 2 H), 5.44 (s, 2 H), 4.17 (m, 4 H), 3.71 (t, 2 H, J=5.6 Hz), 3.06 (s, 3 H), 1.51 (s, 9 H). <sup>13</sup>C NMR (DMSO-d<sub>6</sub>, 100 MHz): δ=161.73, 159.56, 156.29, 149.81, 147.38, 146.43, 139.52, 139.12, 135.17, 129.83, 128.45, 128.01, 127.00, 126.76, 116.53, 113.12, 102.47, 96.32, 82.42, 66.53, 61.12, 50.80, 45.51, 43.52, 30.93, 27.62, 22.04, 13.94, 8.50. HRMS(ESI):m/z calcd for C<sub>33</sub>H<sub>33</sub>N<sub>9</sub>O<sub>5</sub>S 655.2325; found 675.2323, [M+Na]<sup>+</sup>.

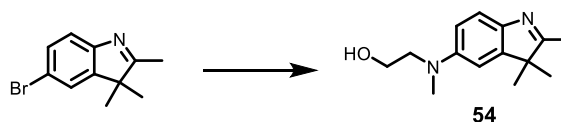

10

11

12

13

14

15

16

**Compound 54:** This compound was obtained by following the general procedure for compound 18. (0.530 g, yield 81%). <sup>1</sup>H NMR (400 MHz, CDCl<sub>3</sub>) δ 7.40 (d, J = 8.4 Hz, 1H), 6.78 (d, J = 2.4 Hz, 1H), 6.74 (dd, J = 8.5, 2.5 Hz, 1H), 3.83 (t, J = 5.6 Hz, 2H), 3.49 (t, J = 5.6 Hz, 2H), 2.99 (s, 3H), 2.27 (s, 3H), 1.29 (s, 6H). <sup>13</sup>C NMR (101 MHz, CDCl<sub>3</sub>) δ 185.07, 149.33, 146.91, 119.88, 112.43, 107.39, 59.92, 56.50, 53.60, 39.42, 23.39. MS(ESI):m/z calcd for C<sub>14</sub>H<sub>20</sub>N<sub>2</sub>O 232.2 ; found 233.1, [M+H]<sup>+</sup>.

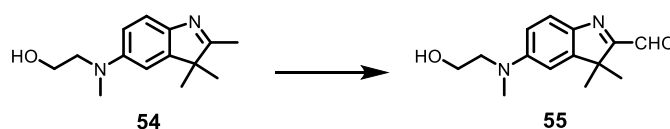

17

18

19

20

21

22

23

24

25

26

**Compound 55:** To a clear solution of Compound 56 (0.46 g, 2.0 mmol) in 100 mL dioxane, SeO<sub>2</sub> (0.275 g, 2.5 mmol) was added under Ar atmosphere and the mixture was stirred at rt for 5 hrs. Then the solvent was removed under reduce pressure to give the crude product which was purified by silica gel column chromatography to afford the purple compound 55. <sup>1</sup>H NMR (400 MHz, CDCl<sub>3</sub>) δ 9.90 (s, 1H), 7.67 (d, J = 8.7 Hz, 1H), 6.78 (dd, J = 8.8, 2.6 Hz, 1H), 6.69 (d, J = 2.5 Hz, 1H), 3.89 (t, J = 5.7 Hz, 2H), 3.70 (s, 3H), 3.70 (s, 3H), 3.61 (t, J = 5.7 Hz, 2H), 3.11 (s, 3H), 1.45 (s, 6H). <sup>13</sup>C NMR (101 MHz, CDCl<sub>3</sub>) δ 188.54, 176.25, 151.30, 143.51, 124.92, 111.99, 104.29, 72.79, 67.09, 60.14, 55.17, 52.06, 39.45, 22.95. MS(ESI):m/z calcd for C<sub>14</sub>H<sub>18</sub>N<sub>2</sub>O<sub>2</sub> 246.1 ; found 247.1, [M+H]<sup>+</sup>.

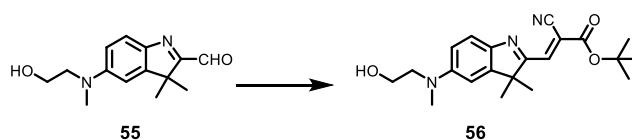

27

1        **Compound 56:** This compound was obtained by following the general procedure for  
2 compound 7. (0.280 g, yield 89%). <sup>1</sup>H NMR (400 MHz, CDCl<sub>3</sub>) δ 8.21 (s, 1H), 7.67 (d, *J* = 8.7 Hz,  
3 1H), 6.78 (dd, *J* = 8.8, 2.6 Hz, 1H), 6.69 (d, *J* = 2.5 Hz, 1H), 3.89 (t, *J* = 5.7 Hz, 2H), 3.70 (s, 3H),  
4 3.70 (s, 3H), 3.61 (t, *J* = 5.7 Hz, 2H), 3.11 (s, 3H), 1.50 (s, 9 H), 1.45 (s, 6H). <sup>13</sup>C NMR (101 MHz,  
5 CDCl<sub>3</sub>) δ 171.54, 176.25, 151.30, 143.51, 124.92, 111.99, 104.29, 72.79, 67.09, 60.14, 55.17,  
6 52.06, 39.45, 27.63, 22.95. MS(ESI):*m/z* calcd for C<sub>21</sub>H<sub>27</sub>N<sub>3</sub>O<sub>3</sub> 369.2 ; found 370.2, [M+H]<sup>+</sup>.

7

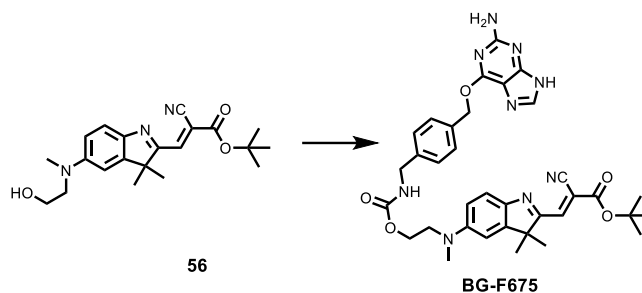

8

9        **Compound BG-F675:** This compound was obtained by following the general procedure  
10 for BG-F485. (0.295 g, yield 81%). <sup>1</sup>H NMR (400 MHz, CDCl<sub>3</sub>) δ 12.41 (s, 1 H), 8.20 (s, 1H), 7.80  
11 (s, 1 H), 7.67 (d, *J* = 8.7 Hz, 1H), 7.43 (d, *J* = 8.0 Hz, 2H), 7.24 (d, *J* = 8.0 Hz, 2H), 6.78 (dd, *J* = 8.8,  
12 2.6 Hz, 1H), 6.69 (d, *J* = 2.5 Hz, 1H), 6.29 (s, 2 H), 5.45 (s, 2 H), 4.13 (d, *J* = 6.0 Hz, 2 H), 3.89 (t, *J*  
13 = 5.7 Hz, 2H), 3.70 (s, 3H), 3.70 (s, 3H), 3.61 (t, *J* = 5.7 Hz, 2H), 3.11 (s, 3H), 1.50 (s, 9 H), 1.45  
14 (s, 6H). <sup>13</sup>C NMR (101 MHz, CDCl<sub>3</sub>) δ 171.54, 176.25, 159.82, 158.61, 155.80, 155.21, 151.30,  
15 143.51, 140.10, 137.81, 135.11, 128.51, 126.89, 124.92, 113.49, 111.99, 104.29, 77.80, 72.79,  
16 67.09, 60.14, 55.17, 52.06, 43.21, 39.45, 28.36, 27.63, 22.95. HRMS(ESI):*m/z* calcd for  
17 C<sub>35</sub>H<sub>39</sub>N<sub>9</sub>O<sub>5</sub> 665.3074; found 688.2972, [M+Na]<sup>+</sup>.

18

19

20

21



## Supplementary References

1. Filonov, G.S. & Verkhusha, V.V. A near-infrared BiFC reporter for in vivo imaging of protein-protein interactions. *Chemistry & biology* **20**, 1078-1086 (2013).
2. Greenwald, R.B., Choe, Y.H., McGuire, J. & Conover, C.D. Effective drug delivery by PEGylated drug conjugates. *Advanced drug delivery reviews* **55**, 217-250 (2003).
3. Nakai, J., Ohkura, M. & Imoto, K. A high signal-to-noise Ca(2+) probe composed of a single green fluorescent protein. *Nature biotechnology* **19**, 137-141 (2001).
4. Tallini, Y.N. et al. Imaging cellular signals in the heart in vivo: Cardiac expression of the high-signal Ca<sup>2+</sup> indicator GCaMP2. *Proceedings of the National Academy of Sciences of the United States of America* **103**, 4753-4758 (2006).
5. Dana, H. et al. High-performance calcium sensors for imaging activity in neuronal populations and microcompartments. *Nature methods* **16**, 649-657 (2019).
6. Zhao, Y. et al. An expanded palette of genetically encoded Ca(2+)(+) indicators. *Science* **333**, 1888-1891 (2011).
7. Hashizume, R. et al. A genetically encoded far-red fluorescent calcium ion biosensor derived from a biliverdin-binding protein. *Protein science : a publication of the Protein Society* **31**, e4440 (2022).
8. Shaner, N.C., Steinbach, P.A. & Tsien, R.Y. A guide to choosing fluorescent proteins. *Nature methods* **2**, 905-909 (2005).
9. Wang, L., Jackson, W.C., Steinbach, P.A. & Tsien, R.Y. Evolution of new nonantibody proteins via iterative somatic hypermutation. *Proceedings of the National Academy of Sciences of the United States of America* **101**, 16745-16749 (2004).
10. Shu, X. et al. Mammalian expression of infrared fluorescent proteins engineered from a bacterial phytochrome. *Science* **324**, 804-807 (2009).
11. Yu, D. et al. An improved monomeric infrared fluorescent protein for neuronal and tumour brain imaging. *Nature communications* **5**, 3626 (2014).
12. Lin, M.Z. et al. Autofluorescent proteins with excitation in the optical window for intravital imaging in mammals. *Chemistry & biology* **16**, 1169-1179 (2009).
13. Shcherbo, D. et al. Near-infrared fluorescent proteins. *Nature methods* **7**, 827-829 (2010).
14. Morozova, K.S. et al. Far-red fluorescent protein excitable with red lasers for flow cytometry and superresolution STED nanoscopy. *Biophysical journal* **99**, L13-15 (2010).
15. Piatkevich, K.D. et al. Extended Stokes Shift in Fluorescent Proteins: Chromophore-Protein Interactions in a Near-Infrared TagRFP675 Variant. *Scientific reports* **3** (2013).
16. Shcherbakova, D.M. & Verkhusha, V.V. Near-infrared fluorescent proteins for multicolor in vivo imaging. *Nature methods* **10**, 751-754 (2013).
17. Chu, J. et al. Non-invasive intravital imaging of cellular differentiation with a bright red-excitable fluorescent protein. *Nature methods* **11**, 572-578 (2014).
18. Yu, D. et al. A naturally monomeric infrared fluorescent protein for protein labeling in vivo. *Nature methods* **12**, 763-765 (2015).
19. Rodriguez, E.A. et al. A far-red fluorescent protein evolved from a cyanobacterial phycobiliprotein. *Nature methods* **13**, 763-769 (2016).
20. Shcherbakova, D.M. et al. Bright monomeric near-infrared fluorescent proteins as

- 1 tags and biosensors for multiscale imaging. *Nature communications* **7**, 12405 (2016).
- 2 21. Bajar, B.T. et al. Fluorescent indicators for simultaneous reporting of all four cell cycle  
3 phases. *Nature methods* **13**, 993-996 (2016).
- 4 22. Matela, G. et al. A far-red emitting fluorescent marker protein, mGarnet2, for  
5 microscopy and STED nanoscopy. *Chemical communications* **53**, 979-982 (2017).
- 6 23. Stohr, K. et al. Quenched substrates for live-cell labeling of SNAP-tagged fusion  
7 proteins with improved fluorescent background. *Analytical chemistry* **82**, 8186-8193  
8 (2010).
- 9 24. Komatsu, T. et al. Real-time measurements of protein dynamics using fluorescence  
10 activation-coupled protein labeling method. *Journal of the American Chemical Society*  
11 **133**, 6745-6751 (2011).
- 12 25. Sun, X. et al. Development of SNAP-tag fluorogenic probes for wash-free fluorescence  
13 imaging. *Chembiochem : a European journal of chemical biology* **12**, 2217-2226 (2011).
- 14 26. Liu, X., Song, J., Kang, Y., Wang, Y. & Chen, A. Long noncoding RNA SOX21-AS1  
15 regulates the progression of triple-negative breast cancer through regulation of miR-  
16 520a-5p/ORMDL3 axis. *Journal of cellular biochemistry* (2020).
- 17 27. Liu, T.K. et al. A rapid SNAP-tag fluorogenic probe based on an environment-sensitive  
18 fluorophore for no-wash live cell imaging. *ACS chemical biology* **9**, 2359-2365 (2014).
- 19 28. Yu, W.T., Wu, T.W., Huang, C.L., Chen, I.C. & Tan, K.T. Protein sensing in living cells by  
20 molecular rotor-based fluorescence-switchable chemical probes. *Chem Sci* **7**, 301-307  
21 (2016).
- 22 29. Jung, K.H. et al. A SNAP-tag fluorogenic probe mimicking the chromophore of the red  
23 fluorescent protein Kaede. *Organic & biomolecular chemistry* **17**, 1906-1915 (2019).
- 24 30. Liu, Y. et al. Modulation of Fluorescent Protein Chromophores To Detect Protein  
25 Aggregation with Turn-On Fluorescence. *Journal of the American Chemical Society* **140**,  
26 7381-7384 (2018).
- 27 31. Kang, M.G. et al. Structure-guided synthesis of a protein-based fluorescent sensor for  
28 alkyl halides. *Chemical communications* **53**, 9226-9229 (2017).
- 29 32. Liu, Y. et al. The Cation- $\pi$  Interaction Enables a Halo-Tag Fluorogenic Probe for Fast  
30 No-Wash Live Cell Imaging and Gel-Free Protein Quantification. *Biochemistry* **56**,  
31 1585-1595 (2017).
- 32 33. Bachollet, S. et al. An expanded palette of fluorogenic HaloTag probes with enhanced  
33 contrast for targeted cellular imaging. *Organic & biomolecular chemistry* **20**, 3619-  
34 3628 (2022).
- 35 34. Lukinavicius, G. et al. A near-infrared fluorophore for live-cell super-resolution  
36 microscopy of cellular proteins. *Nature chemistry* **5**, 132-139 (2013).
- 37 35. Butkevich, A.N. et al. Fluorescent Rhodamines and Fluorogenic Carbopyronines for  
38 Super-Resolution STED Microscopy in Living Cells. *Angewandte Chemie* **55**, 3290-3294  
39 (2016).
- 40 36. Grimm, J.B. et al. A general method to fine-tune fluorophores for live-cell and in vivo  
41 imaging. *Nature methods* (2017).
- 42 37. Sato, R. et al. Intracellular Protein-Labeling Probes for Multicolor Single-Molecule  
43 Imaging of Immune Receptor-Adaptor Molecular Dynamics. *Journal of the American*

1 *Chemical Society* **139**, 17397-17404 (2017).

2 38. Liu, Y. et al. AgHalo: A Facile Fluorogenic Sensor to Detect Drug-Induced Proteome  
3 Stress. *Angewandte Chemie* **56**, 8672-8676 (2017).

4 39. Fares, M. et al. A Molecular Rotor-Based Halo-Tag Ligand Enables a Fluorogenic  
5 Proteome Stress Sensor to Detect Protein Misfolding in Mildly Stressed Proteome.  
6 *Bioconjugate chemistry* **29**, 215-224 (2018).

7 40. Grimm, J.B. et al. A general method to optimize and functionalize red-shifted  
8 rhodamine dyes. *Nature methods* **17**, 815-821 (2020).

9 41. Grimm, J.B. et al. A General Method to Improve Fluorophores Using Deuterated  
10 Auxochromes. *JACS Au* **1**, 690-696 (2021).

11 42. Zhang, D. et al. Development of Acrylamide-Based Rapid and Multicolor Fluorogenic  
12 Probes for High Signal-to-Noise Live Cell Imaging. *Bioconjugate chemistry* **30**, 184-191  
13 (2019).

14 43. Samanta, S.R., Da Silva, J.P., Baldrige, A., Tolbert, L.M. & Ramamurthy, V. A Latent  
15 Reaction in a Model GFP Chromophore Revealed upon Confinement:  
16 Photohydroxylation of ortho-Halo Benzylidene-3-methylimidazolidiones via an  
17 Electrocyclization Process. *Organic Letters* **16**, 3304-3307 (2014).

18 44. Keppler, A. et al. A general method for the covalent labeling of fusion proteins with  
19 small molecules in vivo. *Nat Biotech* **21**, 86-89 (2003).

20 45. Los, G.V. et al. HaloTag: a novel protein labeling technology for cell imaging and  
21 protein analysis. *ACS chemical biology* **3**, 373-382 (2008).

22 46. Chen, Z., Jing, C., Gallagher, S.S., Sheetz, M.P. & Cornish, V.W. Second-Generation  
23 Covalent TMP-Tag for Live Cell Imaging. *J. Am. Chem. Soc.* **134**, 13692-13699 (2012).

24

25
